# Supplementary material for: A covalent organic framework as a photocatalyst for window ledge cross-dehydrogenative coupling reactions
Source: Royal Society of Chemistry journal article supplement (doi:10.1039/d1cc06184d), 2021-12-24
Supplement: d1cc06184d1.pdf [file d1cc06184d1.pdf]

**Supporting Information for**

**Covalent organic framework as photocatalyst for window ledge  
cross-dehydrogenative coupling reactions**

Fan Yang, <sup>#a</sup> Cong-Cong Li, <sup>#a</sup> Cui-Cui Xu, <sup>a</sup> Jing-Lan Kan, <sup>a</sup> Bing Tian, <sup>a</sup> Hong-Yan Qu, <sup>a</sup> Yuan Guo, <sup>b</sup> Yan Geng,<sup>\*a</sup> and Yu-Bin Dong<sup>\*a</sup>

<sup>a</sup>College of Chemistry, Chemical Engineering and Materials Science, Collaborative Innovation Center of Functionalized Probes for Chemical Imaging in Universities of Shandong, Key Laboratory of Molecular and Nano Probes, Ministry of Education, Shandong Normal University, Jinan 250014, P. R. China.

<sup>b</sup>School of Light Industry and Engineering, Qilu University of Technology (Shandong Academy of Sciences), Jinan 250353, China.

## Contents

1. Materials and measurements (page S3-S4)
2. Synthesis of **PBT** and **TPPy-BTP-COF** (page S4-S5)
3. Simulated stacking models (page S6-S7)
4. Characterization of **TPPy-BTP-COF** (page S7-S10)
5. Typical synthesis of **3a** with the irradiation of LED lamp and natural sunlight (page S10-S14)
6. Control experiments (page S14-S17)
7. Substrate scope and categories of nucleophile (page S17-S33)
8. Recycling experiments (page S34)
9. Detection of H<sub>2</sub>O<sub>2</sub> (page S34-S35)
10. Crystallographic parameters (page S35-S46)
11. References (page S46)

## 1. Materials and measurements

The synthetic procedures were performed under argon atmosphere. Commercial chemicals (from sigma-Aldrich, JK Chemical and TCI) were used as received. Compound 1 and TPPy were purchased from Zhi-yan Inc., Nanjing.

$^1\text{H}$ -NMR and  $^{13}\text{C}$ -NMR spectra of intermedia products, monomers and catalytic products were recorded at 400MHz on a Bruker Avance spectrometer with tetramethylsilane (TMS) as the internal standard. Powder X-ray diffraction (PXRD) data were collected using a D8 ADVANCE X-ray with Cu K $\alpha$  radiation ( $\lambda = 1.5405 \text{ \AA}$ ). Gas chromatography (GC) analysis was performed on an Agilent 7890B GC. Fourier Transform Infrared (FT-IR) spectra in the region of 400-4000 $\text{cm}^{-1}$  were obtained with a Perkin-Elmer 1600 FT-IR spectrometer. Ultraviolet-visible (UV-vis) absorption spectra were recorded on a Shimadzu UV-2600 Double Beam UV-vis Spectrophotometer. Cyclic voltammetry (CV) measurement was performed on a CHI660E electrochemical workstation in a three-electrode system. The working electrode was prepared by dropcasting an 5% Nafion (50  $\mu\text{L}$ ) suspension of COF (0.2 mg) and carbon black (0.7 mg) onto a glassy carbon electrode. The auxiliary electrode and reference electrode were platinum-wire and Ag/AgNO $_3$ , and the electrolyte was 0.1 M tetrabutylammonium hexafluorophosphate in acetonitrile, Ferrocene was used as a standard to calculate the energy levels vs. vacuum. Thermogravimetric analysis (TGA) was performed on a TGA/DSC 3+ in the temperature range of 30-800  $^\circ\text{C}$  under an nitrogen atmosphere and a heating rate of 10  $^\circ\text{C}/\text{min}$ . Transmission electron microscopy (TEM) analysis was performed on a JEOL 2100 Electron Microscope at an operating voltage of 200 kV. Scanning electron microscopy (SEM) images were performed on a SUB010 scanning electron microscope with acceleration voltage of 20 kV. Solid state  $^{13}\text{C}$  CP-MAS spectrum was acquired at 100.38 MHz using a 4 mm MAS NMR probe with a spinning rate of 8 kHz and a 2 s recycle delay. N $_2$  adsorption-desorption isotherm was obtained using an ASAP 2020/TriStar 3000 (Micromeritics) apparatus measured at 77 K, the sample was degassed at 100  $^\circ\text{C}$  for 12 h under high vacuum before analysis. High-resolution mass spectrometry (HRMS) analysis was detected by Bruker maXis ultrahigh-resolution-TOF mass spectrometer. The models of LED lamp is PL-SX100A. Electron paramagnetic resonance (EPR) spectra was measured by Bruker A300 EPR Spectroscopy. The elemental analysis was determined by Elementar Vario EL (Germany). X-ray photoelectron spectroscopy (XPS) was performed using an ESCALAB 250 X-ray photoelectron spectrometer with a monochromatized Al K $\alpha$  X-ray

source (1486.71 eV). the CHNS analysis was performed by Elementar: UNICUBE. The electrochemical impedance spectra (EIS) was performed by Correst Electrochemical Workstation CS310H.

## 2. Synthesis of PBT and TPPy-PBT-COF

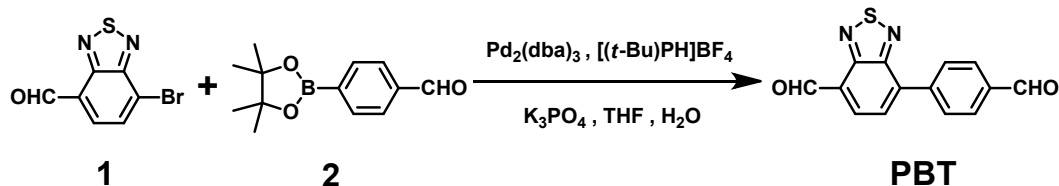

**Scheme S1** Chemical Structure of **PBT** and its synthetic route.

**Synthesis of PBT.** To a 100 mL pressure tube was added 7-bromo-benzo[*c*][1,2,5]thiadiazole-4-carbaldehyde (**1**, 500 mg, 2.06 mmol), 4-formylphenylboronic acid pinacol cyclic ester (**2**, 525.13 mg, 2.26 mmol), [(*t*-Bu)PH]BF<sub>4</sub> (41.77 mg, 0.14 mmol), 1 mL K<sub>3</sub>PO<sub>4</sub> aqueous solution (2M) and 10 mL THF. Then the mixture was degassed-inflated with nitrogen three times before Pd<sub>2</sub>(dba)<sub>3</sub> (37.67 mg, 0.04 mmol) was added. The reaction system was heated up to 80 °C for 24 h. Then the mixture was cooled to room temperature and poured into water, a yellowish solid precipitated, and then the precipitate was filtered and dried in a vacuum oven. The crude product was purified by silica gel chromatography (dichloromethane : petroleum ether, v/v = 1 : 1 as eluent) to obtain **PBT** as a yellowish powder (380 mg, 69% yield). <sup>1</sup>H NMR (CDCl<sub>3</sub>, 400 MHz): δ (ppm) 10.77 (s, 1H), 10.07 (s, 1H), 8.29-8.27 (d, *J* = 8.0 Hz, 1H), 8.11-8.01 (dd, *J* = 32.0, 8.0 Hz, 4H), 7.91-7.89 (d, *J* = 8.0 Hz, 1H). <sup>13</sup>C NMR (CDCl<sub>3</sub>, 100 MHz) δ (ppm) 191.68, 188.81, 153.75, 153.71, 142.06, 138.73, 136.62, 131.99, 130.25, 130.00, 127.87, 127.16. (EI): Found: 269.04. (calcd for C<sub>14</sub>H<sub>8</sub>N<sub>2</sub>O<sub>2</sub>S+H: 269.04).

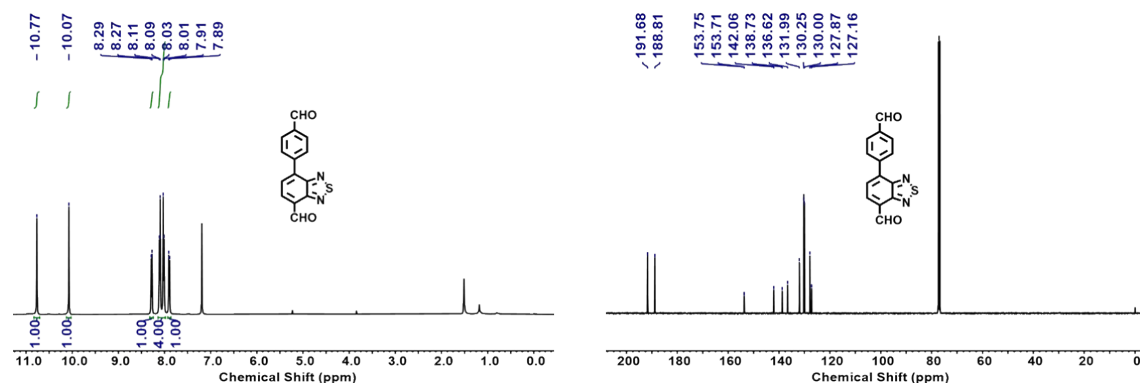

**Fig. S1**  $^1\text{H}$ -NMR and  $^{13}\text{C}$ -NMR of the monomer **PBT**.

**Synthesis of TPPy-PBT-COF.** A 10 mL Pyrex tube was charged with 1,3,6,8-tetra (4-aminophenyl) pyrene (TPPy, 28 mg, 0.04 mmol), 7-(4-formylphenyl)benzo[*c*][1,2,5]thiadiazole-4-carbaldehyde (**PBT**, 21.6 mg, 0.08 mmol), and *o*-dichlorobenzene/EtOH (3:1 v/v, 2 mL). After the mixture was sonicated for 1 min, a yellowish suspension was obtained. Subsequently, 0.2 mL of acetic acid (6 M) were added and the mixture was sonicated for another 20s again. Afterwards, the tube was flash frozen at 77 K using a liquid  $\text{N}_2$  bath and degassed by three freeze-pump-thaw cycles, sealed under vacuum and then heated at 120 °C for 3 days. A red precipitate was formed, which was collected by sucking filtration and thoroughly washed with acetone, anhydrous ethanol, tetrahydrofuran, and dichloromethane, respectively. The collected sample was dried under vacuum at 120°C for 24 h to give an red powder (44 mg, 95% yield). Elemental analysis (%): Anal. Calcd. For  $(\text{C}_{68}\text{H}_{38}\text{N}_8\text{S}_2)_n$ : C, 79.20; H, 3.71; N, 10.87; S, 6.22. Found: C, 77.50; H, 4.02; N, 10.19; S, 5.82.

### 3. Simulated stacking models

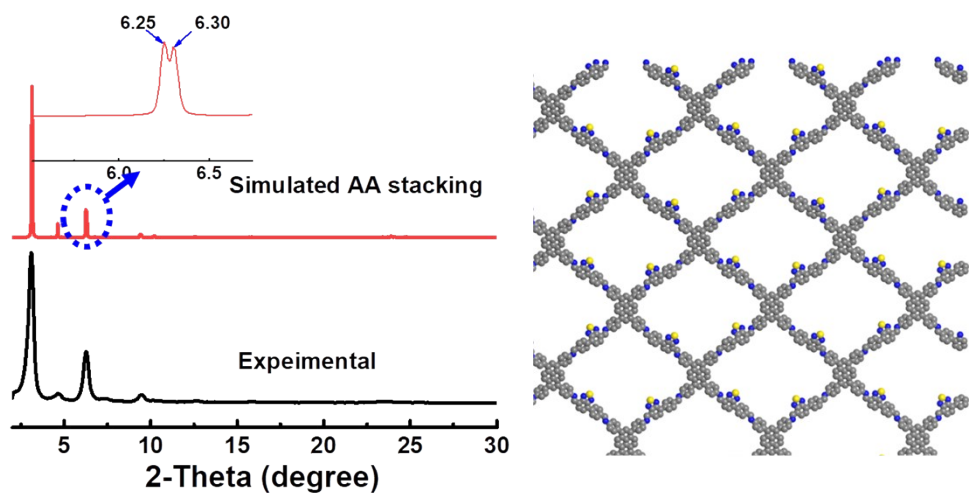

**Fig. S2** Comparison of the experimental (black) and simulated (red) AA stacking PXRD patterns of TPPy-PBT-COF and the top view of the simulated structure of AA stacking model.

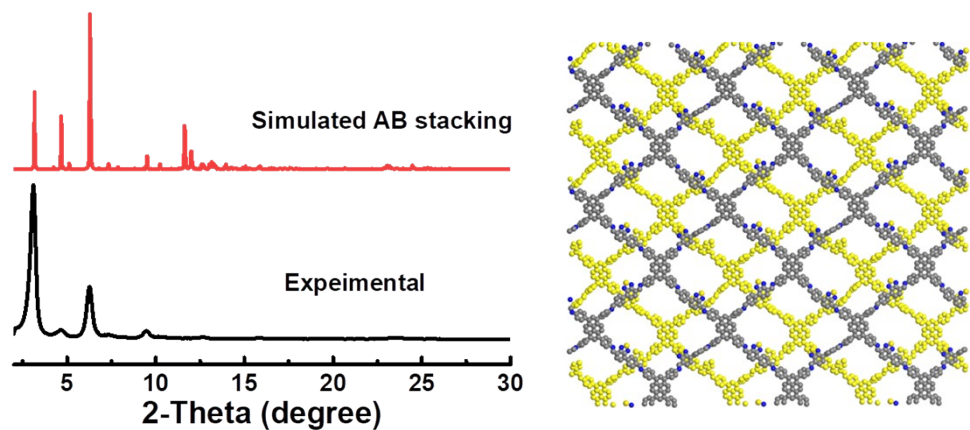

**Fig. S3** Comparison of the experimental (black) and simulated (red) AB stacking PXRD patterns of TPPy-PBT-COF and the top view of the simulated structure of AB stacking model.

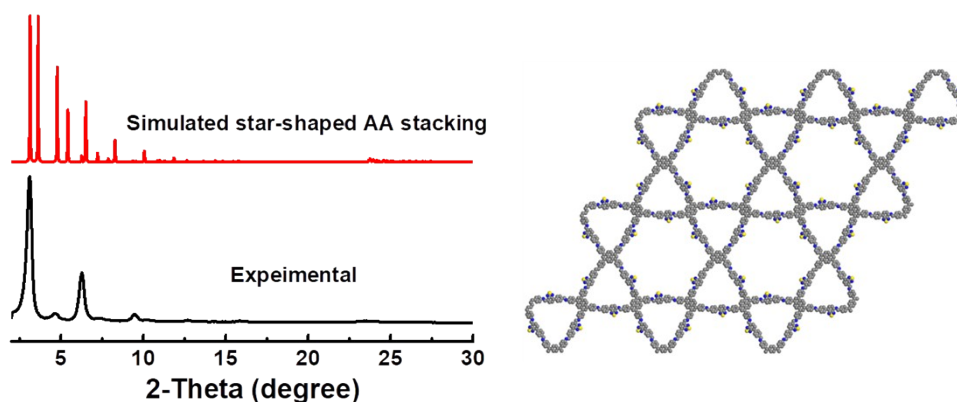

**Fig. S4** Comparison of the experimental (black) and simulated (red) star-shaped AA stacking PXRD patterns of TPPy-PBT-COF and the top view of the simulated structure of star-shaped AA stacking model.

#### 4. Characterization of TPPy-PBT-COF

##### 4.1. XPS spectra of the COF

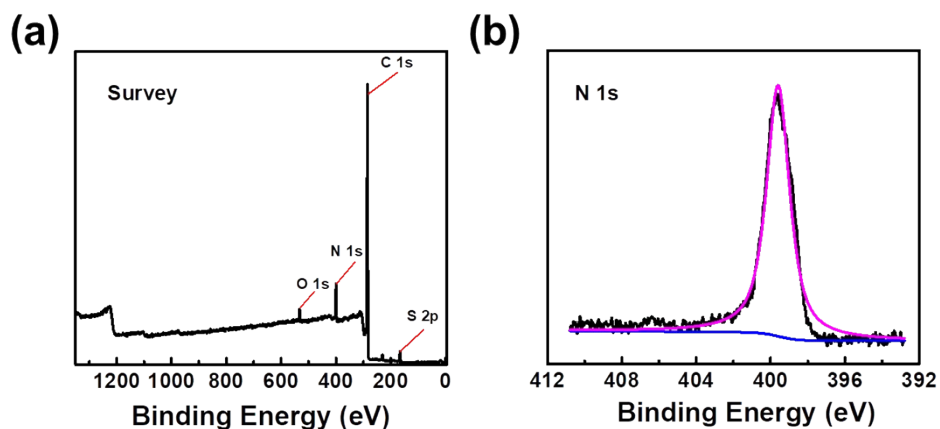

**Fig. S5** (a) Survey and (b) N1s spectrum of TPPy-PBT-COF. The single peak at 399.5 eV is ascribed to C=N linkage.

##### 4.2. BET surface area and pore sizes distribution

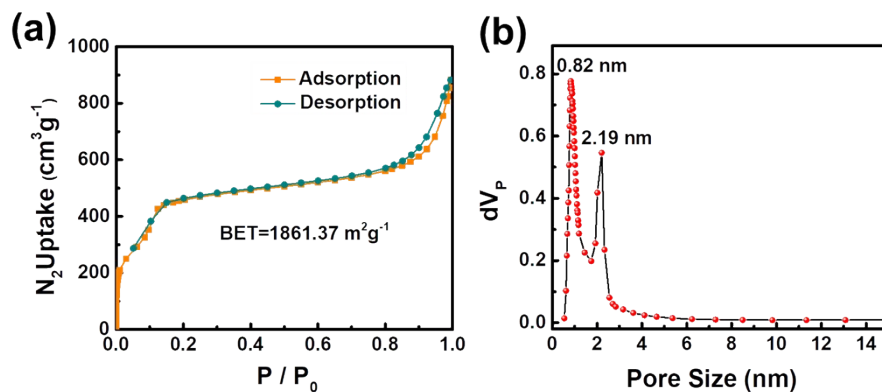

**Fig. S6** (a)  $N_2$  adsorption-desorption isotherms. (b) Pore size distribution profile.

#### 4.3. TGA curve of TPPy-PBT-COF

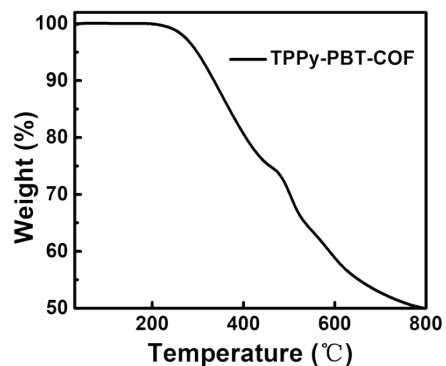

**Fig. S7** TGA curve of TPPy-PBT-COF.

#### 4.4. SEM and TEM images of TPPy-PBT-COF

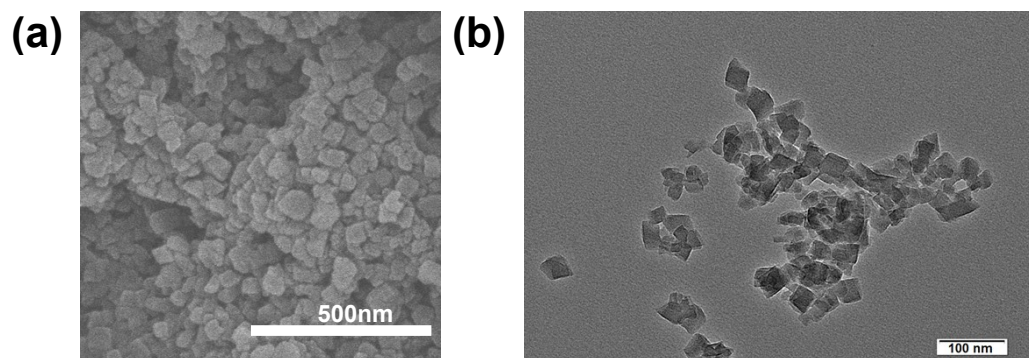

**Fig. S8** Scanning electron microscopy (SEM) and transmission electron microscopy (TEM) images of TPPy-PBT-COF.

#### 4.5. DFT calculations



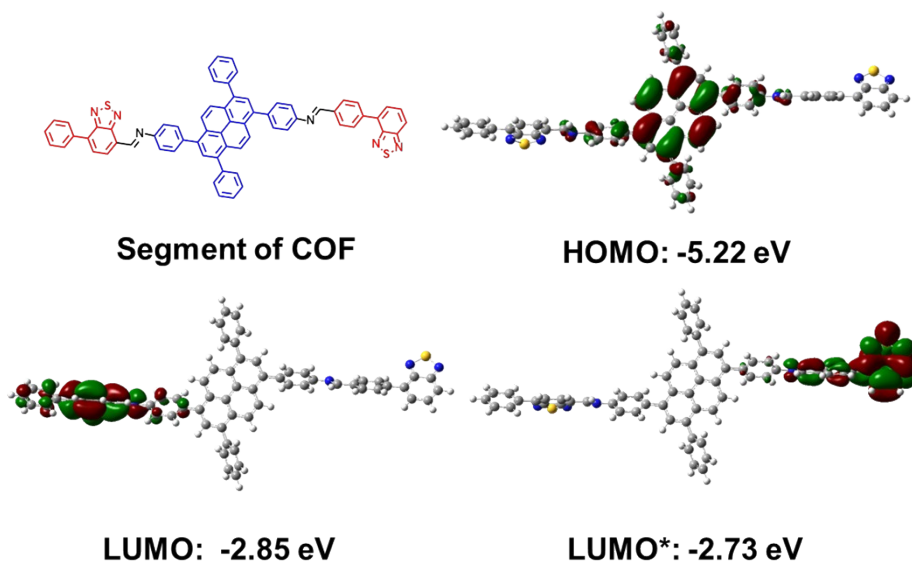

**Fig. S9** Optimized molecular geometries and frontier molecular orbitals for the segment of TPPy-PBT-COF at B3LYP/6-311G(d, p) level, LUMO and LUMO\* are degenerate orbital energy levels.

#### 4.6. CV curves

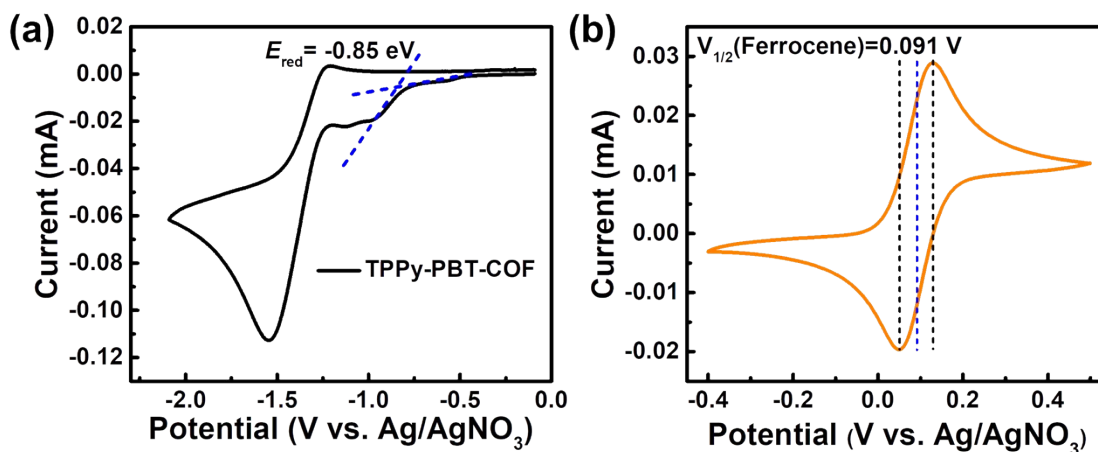

**Fig. S10** Cyclic voltammetry graph of (a) TPPy-PBT-COF, (b) ferrocene.

The energy level of TPPy-PBT-COF vs. vacuum were derived from the following equations.

$$E_{\text{LUMO}} = -(E_{\text{red}}(\text{onset}) - E_{1/2}(\text{Fc}) + 4.8) \text{ eV}$$

$$E_{\text{HOMO}} = E_{\text{LUMO}} - E_{\text{g}}$$

#### 4.7. Electrochemical impedance spectra (EIS) of COF

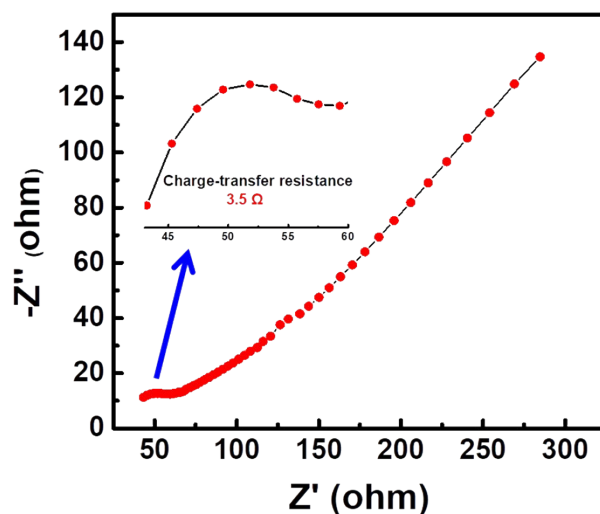

**Fig. S11** Electrochemical impedance spectroscopy (EIS) Nyquist plots of TPPy-PBT-COF.

## 5. Typical synthesis of 3a with the irradiation of LED lamp and natural sunlight

### 5.1. The synthetic procedure for substrate 1a

The compound **1a** used in the photocatalysis were synthesized according to the literature.<sup>1</sup>

**1a**: <sup>1</sup>H-NMR (CDCl<sub>3</sub>, 400 MHz) δ (ppm): 7.35-7.30 (m, 2H), 7.25-7.18 (m, 4H), 7.04-7.02 (d, *J* = 8.0 Hz, 2H), 6.89-6.85 (t, *J* = 8.0 Hz, 1H), 4.45 (s, 2H), 3.62-3.59 (t, *J* = 5.8 Hz, 2H), 3.04-3.01 (t, *J* = 5.8 Hz, 2H). <sup>13</sup>C-NMR (CDCl<sub>3</sub>, 100 MHz) δ (ppm): 150.56, 134.89, 134.48, 129.23, 128.55, 126.56, 126.35, 126.05, 118.69, 115.17, 50.75, 46.55, 29.14.

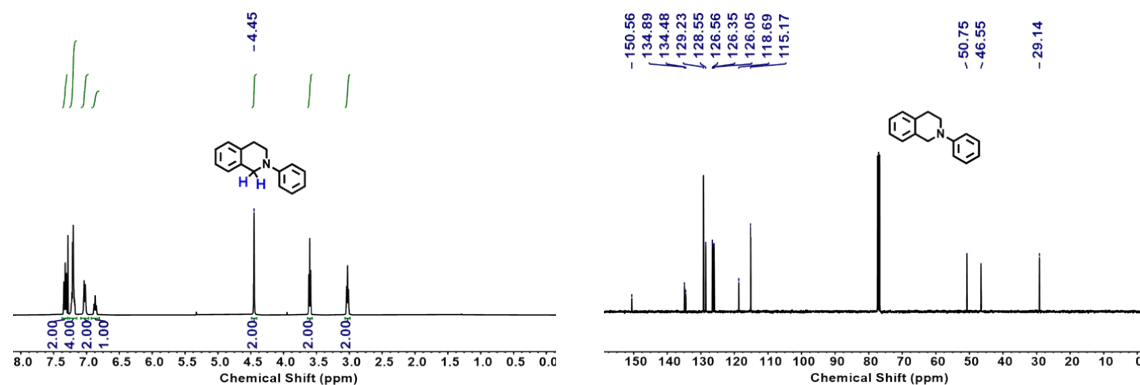

**Fig. S12** <sup>1</sup>H-NMR (left) and <sup>13</sup>C-NMR (right) of **1a**.

### 5.2. The synthetic procedure for 3a.

A 10 mL quartz tube was charged with **1a** (0.2 mmol), L-proline (0.06 mmol), **TPPy-PBT-COF** (5 mg), acetone (0.5 mL) and methanol (2 mL). The mixture was bubbled with oxygen and stirred, then the tube was irradiated with LED lamp or natural sunlight in room temperature. After reaction, the solution was centrifuged and the supernatant was removed by rotary evaporation. Yields were determined by GC and <sup>1</sup>H-NMR spectroscopy with 0.2 mmol diphenylacetoneitrile (DPAT) as internal standard.

**3a**: <sup>1</sup>H-NMR (CDCl<sub>3</sub>, 400 MHz) δ (ppm): 7.20-7.15 (m, 2H), 7.12-7.04 (m, 4H), 6.87-6.85 (d, *J* = 8.0 Hz, 2H), 6.72-6.69 (t, *J* = 7.2 Hz, 1H), 5.34-5.31 (t, *J* = 5.7 Hz, 1H), 3.60-3.55 (m, 1H), 3.49-3.42 (m, 1H), 3.02-2.94 (m, 2H), 2.78-2.72 (m, 2H), 2.00 (s, 3H). <sup>13</sup>C-NMR (CDCl<sub>3</sub>, 100 MHz) δ (ppm): 207.33, 148.88, 139.38, 134.46, 129.39, 128.71, 126.85, 126.32, 118.28, 114.78, 54.82, 50.23, 42.08, 31.16, 27.23.

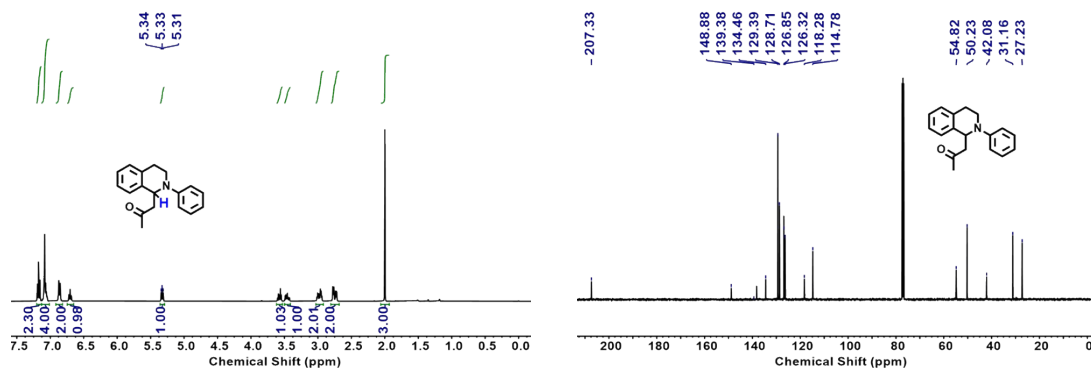

Fig. S13 <sup>1</sup>H-NMR (left) and <sup>13</sup>C-NMR (right) of **3a**.

### 5.3. Yields of **3a** determined by <sup>1</sup>H-NMR and GC analysis

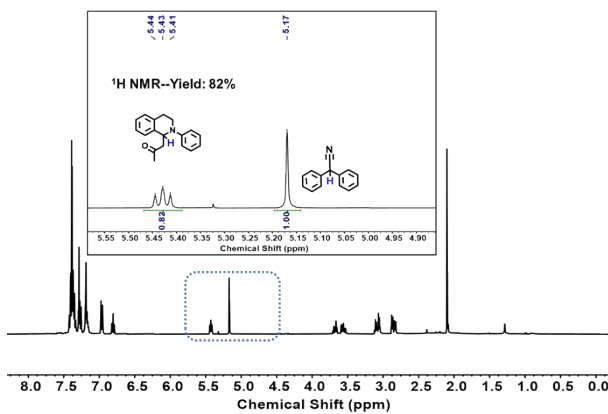

Fig. S14 Yield of **3a** determined by <sup>1</sup>H-NMR with DPAT as internal standard (with white LED).



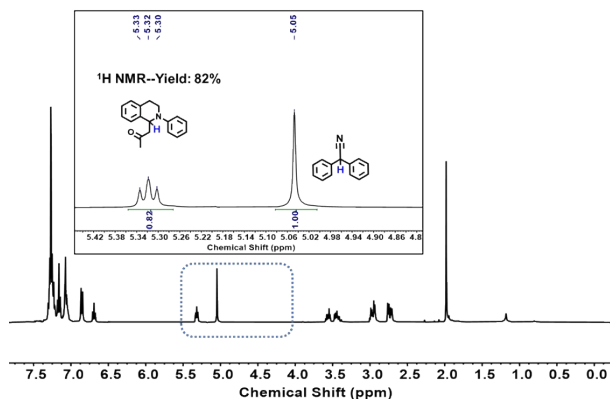

**Fig. S18** Yield of **3a** determined by  $^1\text{H-NMR}$  with DPAT as internal standard (with green LED).

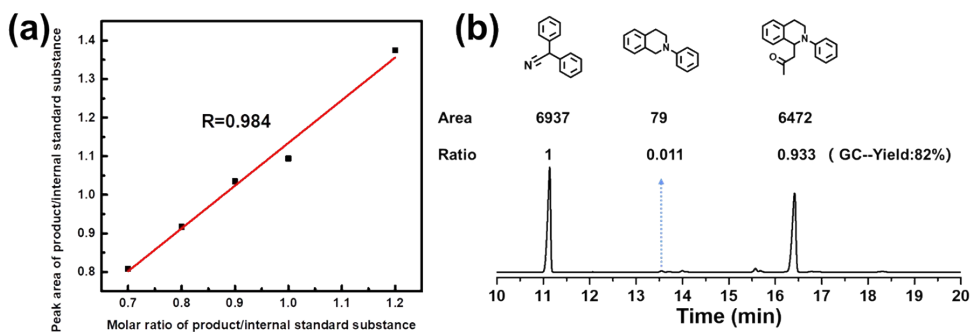

**Fig. S19** Yield of **3a** determined by GC with DPAT as internal standard (with green LED).

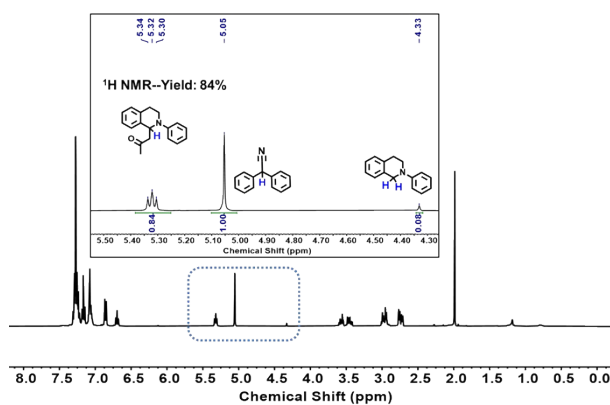

**Fig. S20** Yield of **3a** determined by  $^1\text{H-NMR}$  with DPAT as internal standard (with sunlight).

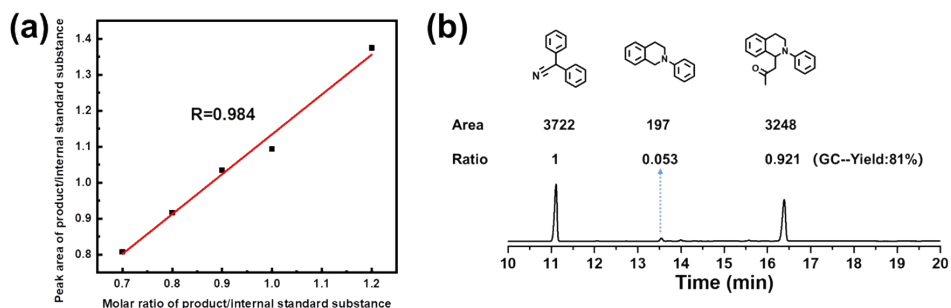

Fig. S21 Yield of **3a** determined by GC with DPAT as internal standard (with sunlight).

#### 5.4. Photograph of photocatalytic device under the irradiation of natural sunlight

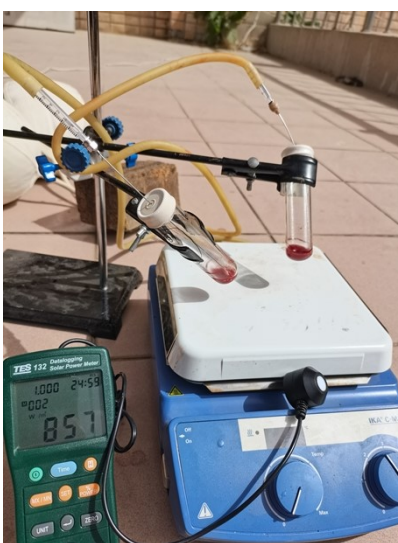

Fig. S22 photocatalytic devices under the irradiation of natural sunlight.

#### 6. Control experiments

Table S1. The control experiment determined by  $^1\text{H-NMR}$  analysis.

| Reactant              | Solvent                 | Light | COF | O <sub>2</sub> | L-proline (mol%) | Time (h) | T.M.      | Yield (%) |
|-----------------------|-------------------------|-------|-----|----------------|------------------|----------|-----------|-----------|
| <b>1a</b>             | <b>CH<sub>3</sub>CN</b> | √     | √   | √              | <b>30</b>        | <b>9</b> | <b>3a</b> | <b>72</b> |
| <b>1a</b>             | <b>Toluene</b>          | √     | √   | √              | <b>30</b>        | <b>9</b> | <b>3a</b> | <b>51</b> |
| <b>1a</b>             | <b>CH<sub>3</sub>OH</b> | √     | √   | √              | <b>30</b>        | <b>9</b> | <b>3a</b> | <b>84</b> |
| <b>1a</b>             | <b>CH<sub>3</sub>OH</b> | √     | √   | -              | <b>30</b>        | <b>9</b> | <b>3a</b> | <b>0</b>  |
| <b>1a</b>             | <b>CH<sub>3</sub>OH</b> | √     | -   | √              | <b>30</b>        | <b>9</b> | <b>3a</b> | <b>27</b> |
| <b>1a</b>             | <b>CH<sub>3</sub>OH</b> | -     | √   | √              | <b>30</b>        | <b>9</b> | <b>3a</b> | <b>0</b>  |
| <b>1a</b>             | <b>CH<sub>3</sub>OH</b> | √     | √   | √              | <b>0</b>         | <b>9</b> | <b>3a</b> | <b>5</b>  |
| <b><sup>b</sup>1a</b> | <b>CH<sub>3</sub>OH</b> | √     | -   | √              | <b>30</b>        | <b>9</b> | <b>3a</b> | <b>44</b> |

<sup>b</sup> The monomer TPPy (5 mg) was used as catalyst instead of TPPy-PBT-COF (5 mg).

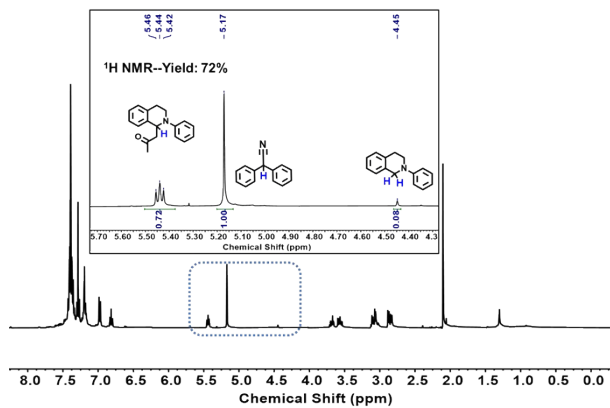

Fig. S23 Yield of **3a** with CH<sub>3</sub>CN as solvent.

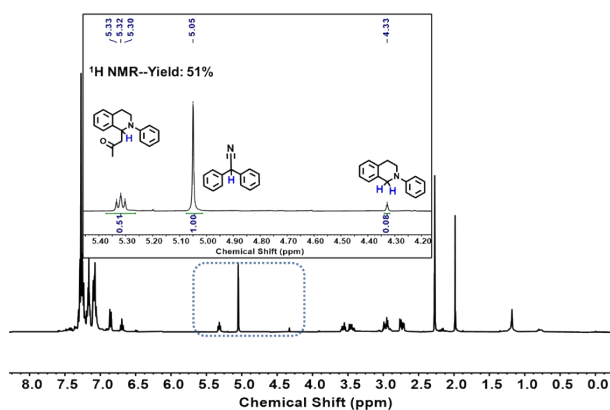

Fig. S24 Yield of **3a** with toluene as solvent.

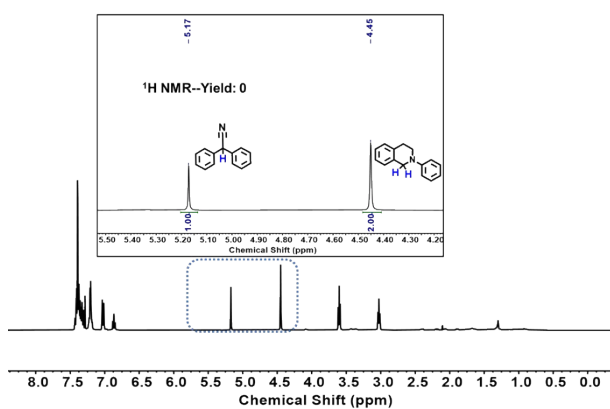

Fig. S25 Yield of **3a** in the absence of O<sub>2</sub>.

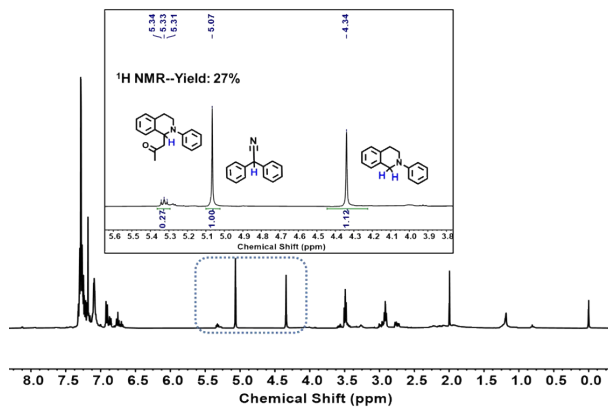

Fig. S26 Yield of **3a** in the absence of TPPy-PBT-COF.

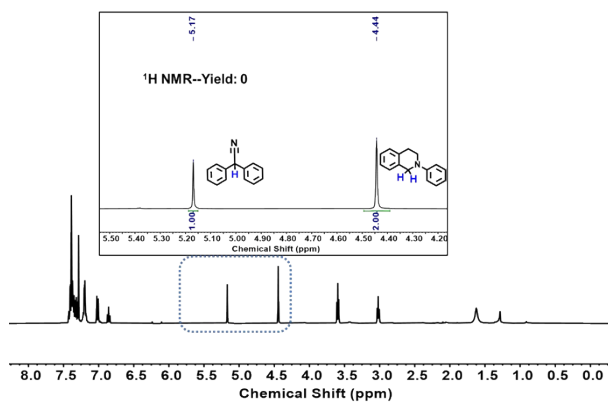

Fig. S27 Yield of **3a** in the absence of light.

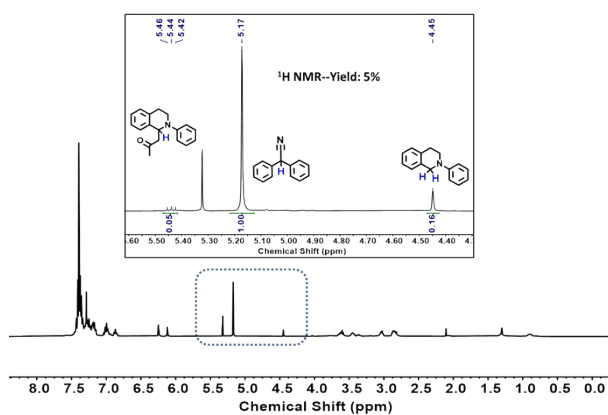

Fig. S28 Yield of **3a** in the absence of L-proline.



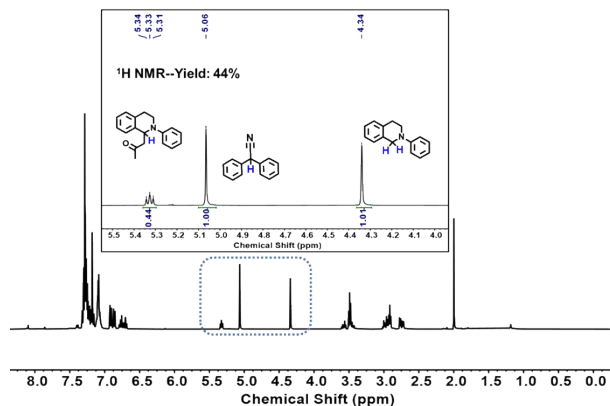

Fig. S29 Yield of **3a** with TPPy as catalyst.

## 7. Substrate scope and categories of nucleophile

### 7.1. The synthetic procedures for substrates **1b-1h**.

The compounds **1b-1h** used in the photocatalysis were synthesized according to the literature.<sup>1</sup>

**1b**: <sup>1</sup>H-NMR (CDCl<sub>3</sub>, 400 MHz) δ (ppm): 7.13-7.01 (m, 6H), 6.87-6.83 (m, 2H), 4.28 (s, 2H), 3.45-3.42 (t, *J* = 5.9 Hz, 2H), 2.92-2.90 (t, *J* = 5.9 Hz, 2H), 2.21 (s, 3H). <sup>13</sup>C-NMR (CDCl<sub>3</sub>, 100 MHz) δ (ppm): 148.61, 134.75, 134.56, 129.75, 128.63, 128.49, 126.56, 126.29, 125.97, 115.91, 51.53, 47.33, 29.08, 20.44.

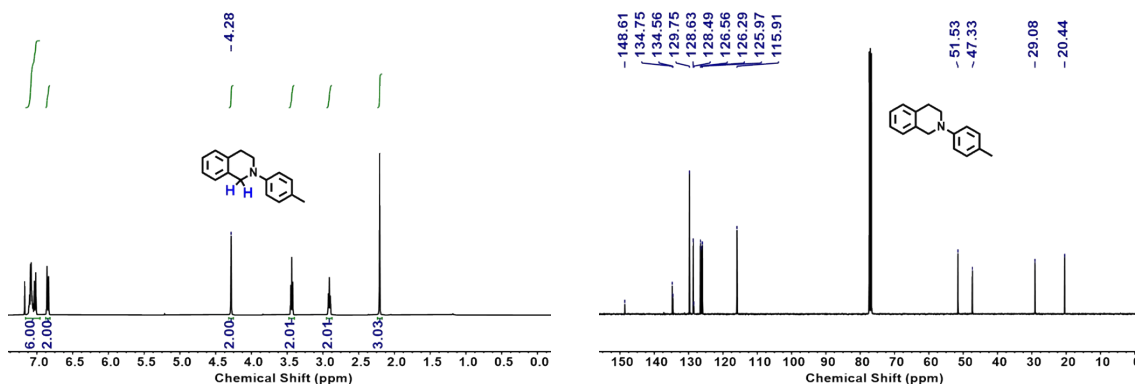

Fig. S30 <sup>1</sup>H-NMR (left) and <sup>13</sup>C-NMR (right) of **1b**.

**1c**: <sup>1</sup>H-NMR (CDCl<sub>3</sub>, 400 MHz) δ (ppm): 7.22-7.12 (m, 4H), 7.01-6.89 (m, 4H), 4.33 (s, 2H), 3.49-3.46 (t, *J* = 5.9 Hz, 2H), 2.99-2.97 (t, *J* = 5.9 Hz, 2H). <sup>13</sup>C-NMR (CDCl<sub>3</sub>, 100 MHz) δ

(ppm): 157.96, 155.60, 147.39, 134.54, 134.28, 128.66, 126.53, 126.42, 126.07, 117.24, 117.16, 115.72, 115.50, 51.93, 47.82, 29.03.

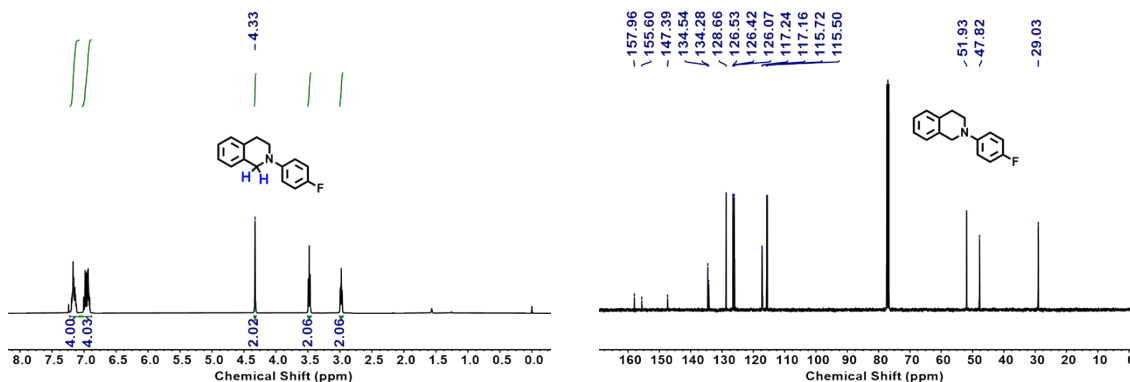

**Fig. S31**  $^1\text{H}$ -NMR (left) and  $^{13}\text{C}$ -NMR (right) of **1c**.

**1d:**  $^1\text{H}$ -NMR ( $\text{CDCl}_3$ , 400 MHz)  $\delta$  (ppm): 7.23-7.15 (m, 5H), 6.72-6.69 (dd,  $J = 8.0$ , 4.0 Hz, 1H), 6.64-6.60 (m, 1H), 6.51-6.46 (m, 1H), 4.41 (s, 2H), 3.57-3.54 (t,  $J = 5.6$  Hz, 2H), 3.00-2.97 (t,  $J = 6.6$  Hz, 2H).  $^{13}\text{C}$ -NMR ( $\text{CDCl}_3$ , 100 MHz)  $\delta$  (ppm): 165.28, 162.87, 152.02, 151.92, 134.87, 134.04, 130.27, 130.17, 128.46, 126.56, 126.24, 109.92, 104.68, 104.46, 101.50, 101.25, 50.12, 45.90, 29.02.

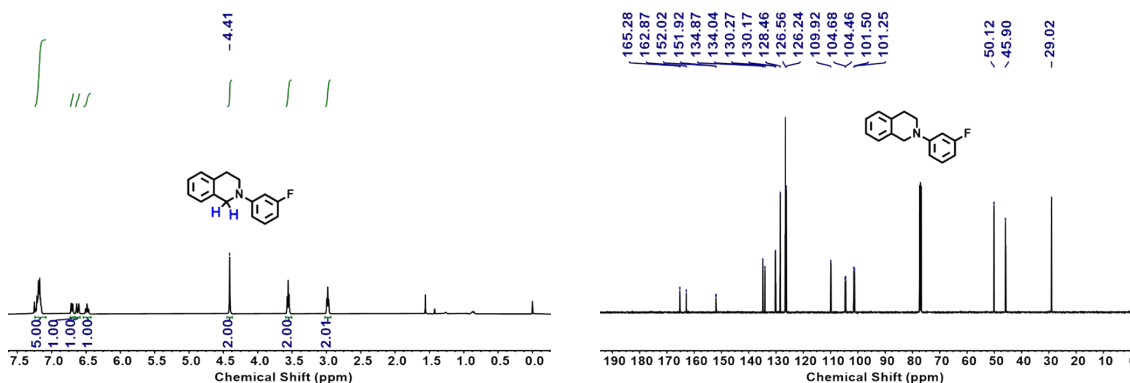

**Fig. S32**  $^1\text{H}$ -NMR (left) and  $^{13}\text{C}$ -NMR (right) of **1d**.

**1e:**  $^1\text{H}$ -NMR ( $\text{CDCl}_3$ , 400 MHz)  $\delta$  (ppm): 7.24-7.13 (m, 6H), 6.90-6.86 (m, 2H), 4.38 (s, 2H), 3.54-3.52 (t,  $J = 4.0$  Hz, 2H), 2.99-2.96 (t,  $J = 6.0$  Hz, 2H).  $^{13}\text{C}$ -NMR ( $\text{CDCl}_3$ , 100 MHz)  $\delta$  (ppm): 149.07, 134.70, 134.09, 129.03, 128.54, 126.54, 126.51, 126.17, 123.34, 116.16, 50.65, 46.54, 28.97.

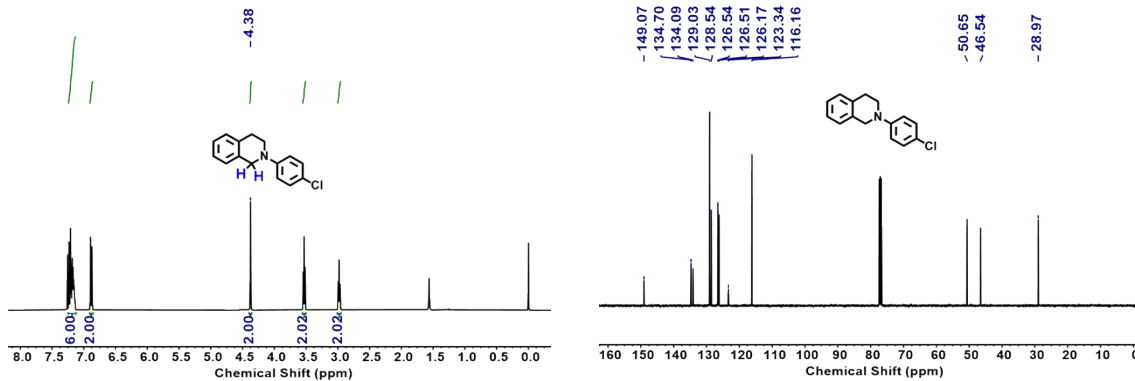

**Fig. S33**  $^1\text{H}$ -NMR (left) and  $^{13}\text{C}$ -NMR (right) of **1e**.

**1f:**  $^1\text{H}$ -NMR ( $\text{CDCl}_3$ , 400 MHz)  $\delta$  (ppm): 7.23-7.16 (m, 5H), 6.92-6.91 (t,  $J = 2.3$  Hz, 1H), 6.84-6.81 (m, 1H), 6.78-6.75 (m, 1H), 4.41 (s, 2H), 3.57-3.54 (t,  $J = 5.8$  Hz, 2H), 3.00-2.97 (t,  $J = 6.1$  Hz, 2H).  $^{13}\text{C}$ -NMR ( $\text{CDCl}_3$ , 100 MHz)  $\delta$  (ppm): 151.39, 135.10, 134.83, 134.01, 130.15, 128.47, 126.58, 126.56, 126.25, 118.00, 114.39, 112.62, 50.09, 45.92, 29.06.

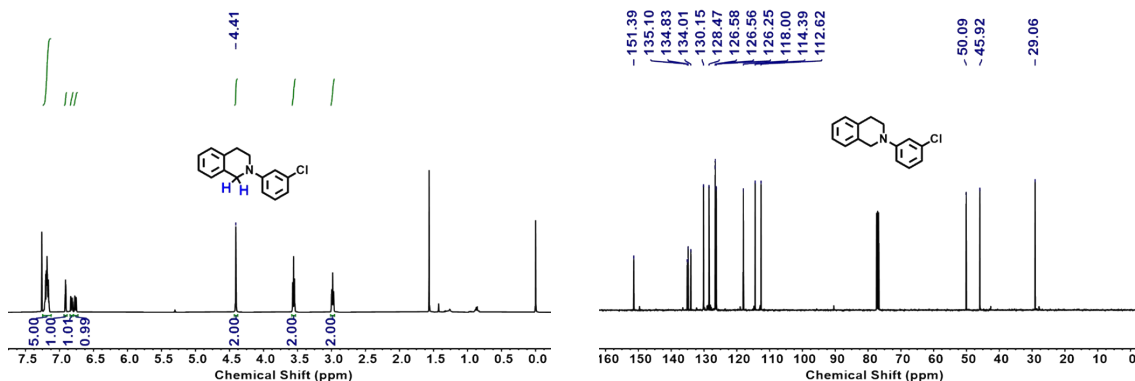

**Fig. S34**  $^1\text{H}$ -NMR (left) and  $^{13}\text{C}$ -NMR (right) of **1f**.

**1g:**  $^1\text{H}$ -NMR ( $\text{CDCl}_3$ , 400 MHz)  $\delta$  (ppm): 7.28-7.24 (d,  $J = 9.0$  Hz, 2H), 7.14-7.05 (m, 4H), 6.75-6.73 (d,  $J = 9.0$  Hz, 2H), 4.28 (s, 2H), 3.45-3.42 (t,  $J = 5.9$  Hz, 2H), 2.90-2.87 (t,  $J = 5.9$  Hz, 2H).  $^{13}\text{C}$ -NMR ( $\text{CDCl}_3$ , 100 MHz)  $\delta$  (ppm): 149.40, 134.71, 134.03, 131.92, 128.52, 126.53, 126.19, 116.50, 110.49, 50.45, 46.34, 28.45.

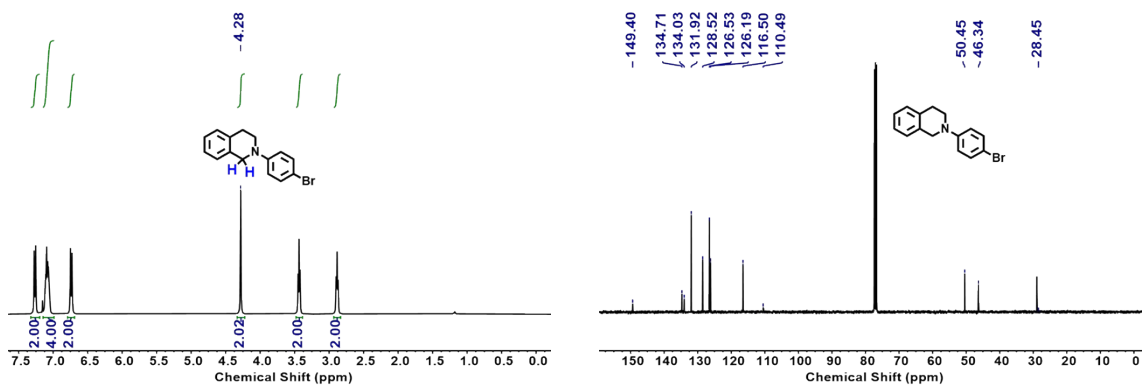

**Fig. S35**  $^1\text{H}$ -NMR (left) and  $^{13}\text{C}$ -NMR (right) of **1g**.

**1h**:  $^1\text{H}$ -NMR ( $\text{CDCl}_3$ , 400 MHz)  $\delta$  (ppm): 7.57-7.53 (m, 2H), 7.25-7.17 (m, 4H), 6.78-6.75 (d,  $J = 8.8$  Hz, 2H), 4.41 (s, 2H), 3.58-3.55 (t,  $J = 5.8$  Hz, 2H), 3.02-2.99 (t,  $J = 6.0$  Hz, 2H).  $^{13}\text{C}$ -NMR ( $\text{CDCl}_3$ , 100 MHz)  $\delta$  (ppm): 150.26, 137.81, 134.73, 134.00, 128.49, 126.55, 126.53, 126.20, 116.93, 50.17, 46.06, 28.90.

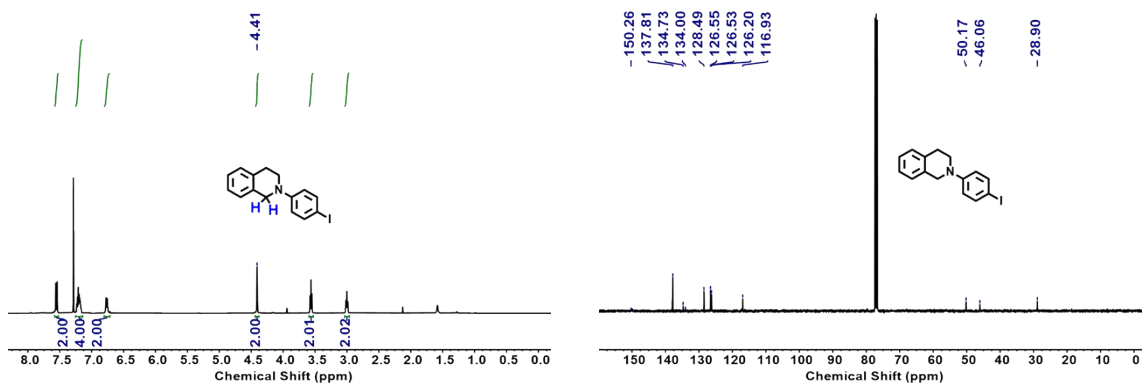

**Fig. S36**  $^1\text{H}$ -NMR (left) and  $^{13}\text{C}$ -NMR (right) of **1h**.

## 7.2. Synthetic procedures for **3b-3h** (Mannich reaction).

**3b-3h**: Same procedures as for **3a** under irradiation of natural sunlight, but now **1b-1h** were used as the substrates.

**3b**:  $^1\text{H}$ -NMR ( $\text{CDCl}_3$ , 400 MHz)  $\delta$  (ppm): 7.21-7.13 (m, 4H), 7.09-7.07 (d,  $J = 8.7$  Hz, 2H), 6.90-6.88 (d,  $J = 8.7$  Hz, 2H), 5.39-5.35 (t,  $J = 6.5$  Hz, 1H), 3.69-3.63 (m, 1H), 3.56-3.49 (m, 1H), 3.10-3.02 (m, 2H), 2.86-2.77 (m, 2H), 2.28 (s, 3H), 2.10 (s, 3H).  $^{13}\text{C}$ -NMR ( $\text{CDCl}_3$ , 100

(MHz)  $\delta$  (ppm): 207.43, 146.90, 138.30, 134.41, 129.86, 128.82, 128.00, 126.87, 126.73, 126.23, 115.70, 55.20, 50.08, 42.21, 31.04, 26.99, 20.36.

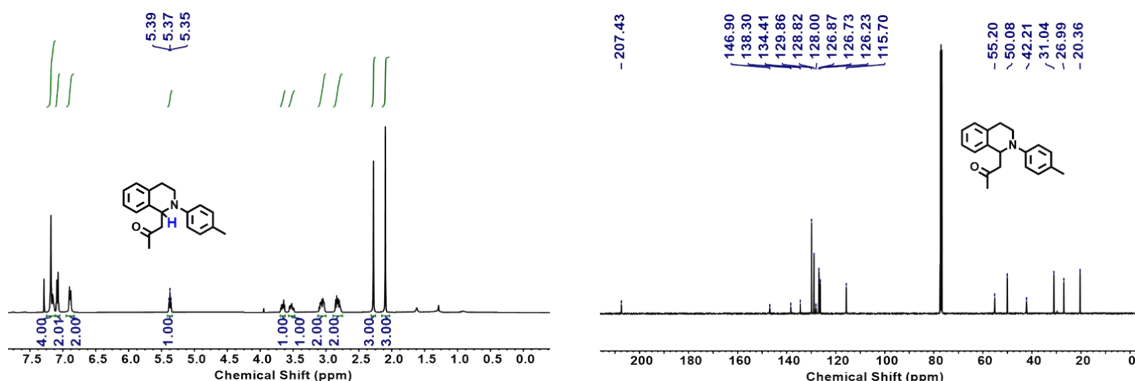

**Fig. S37**  $^1\text{H}$ -NMR (left) and  $^{13}\text{C}$ -NMR (right) of **3b**.

**3c:**  $^1\text{H}$ -NMR ( $\text{CDCl}_3$ , 400 MHz)  $\delta$  (ppm): 7.20-7.11 (m, 4H), 6.97-6.86 (m, 4H), 5.30-5.27 (t,  $J = 6.5$  Hz, 1H), 3.61-3.55 (m, 1H), 3.52-3.46 (m, 1H), 3.06-2.98 (m, 2H), 2.82-2.73 (m, 2H), 2.08 (s, 3H).  $^{13}\text{C}$ -NMR ( $\text{CDCl}_3$ , 100 MHz)  $\delta$  (ppm): 207.21, 157.72, 155.36, 145.77, 138.05, 134.24, 128.90, 126.83, 126.35, 117.22, 117.14, 115.80, 115.58, 55.58, 50.12, 42.66, 31.05, 26.74.

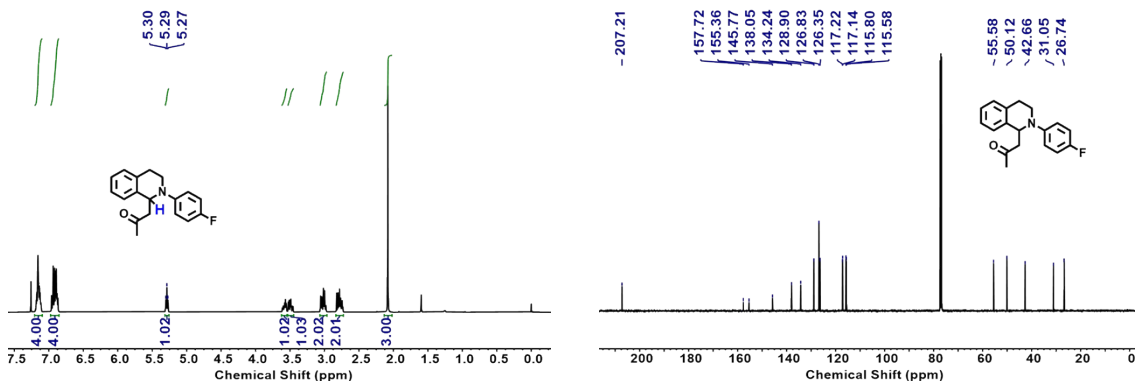

**Fig. S38**  $^1\text{H}$ -NMR (left) and  $^{13}\text{C}$ -NMR (right) of **3c**.

**3d:**  $^1\text{H}$ -NMR ( $\text{CDCl}_3$ , 400 MHz)  $\delta$  (ppm): 7.21-7.13 (m, 5H), 6.70-6.67 (dd,  $J = 8.4, 2.6$  Hz, 1H), 6.62-6.58 (dt,  $J = 12.7, 2.6$  Hz, 1H), 6.48-6.42 (td,  $J = 8.2, 2.4$  Hz, 1H), 5.39-5.35 (t,  $J = 5.2$  Hz, 1H), 3.62-3.50 (m, 2H), 3.09-3.02 (m, 2H), 2.89-2.81 (m, 2H), 2.09 (s, 3H).  $^{13}\text{C}$ -NMR ( $\text{CDCl}_3$ , 100 MHz)  $\delta$  (ppm): 207.03, 165.34, 162.93, 150.44, 150.33, 137.95, 134.33, 130.47, 130.36, 128.62, 127.06, 126.91, 126.48, 109.45, 109.42, 104.34, 104.13, 101.02, 100.76, 54.56, 50.24, 42.25, 31.23, 27.25.

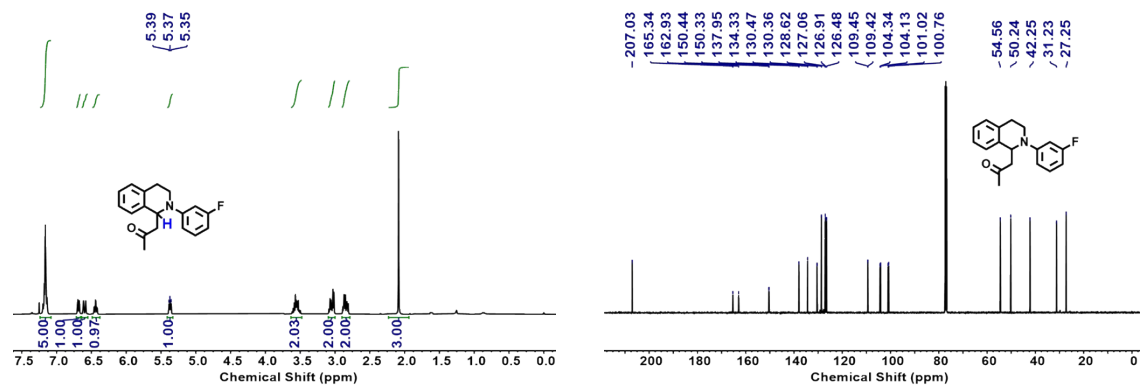

**Fig. S39**  $^1\text{H}$ -NMR (left) and  $^{13}\text{C}$ -NMR (right) of **3d**.

**3e:**  $^1\text{H}$ -NMR ( $\text{CDCl}_3$ , 400 MHz)  $\delta$  (ppm): 7.20-7.12 (m, 6H), 6.87-6.83 (m, 2H), 5.36-5.32 (t,  $J = 6.7$  Hz, 1H), 3.62-3.47 (m, 2H), 3.07-3.00 (m, 2H), 2.85-2.78 (m, 2H), 2.08 (s, 3H).  $^{13}\text{C}$ -NMR ( $\text{CDCl}_3$ , 100 MHz)  $\delta$  (ppm): 207.07, 147.48, 137.95, 134.23, 129.16, 128.74, 126.98, 126.84, 126.43, 122.99, 115.82, 54.78, 50.16, 42.22, 31.16, 27.03.

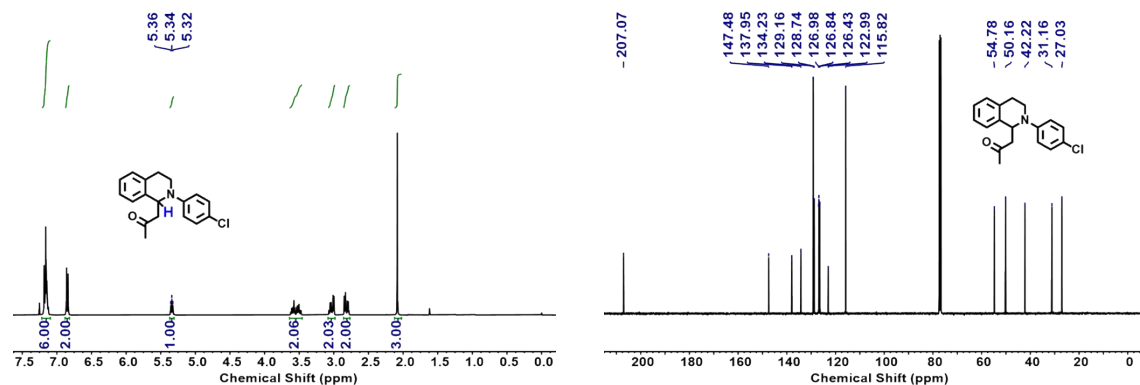

**Fig. S40**  $^1\text{H}$ -NMR (left) and  $^{13}\text{C}$ -NMR (right) of **3e**.

**3f:**  $^1\text{H}$ -NMR ( $\text{CDCl}_3$ , 400 MHz)  $\delta$  (ppm): 7.21-7.13 (m, 5H), 6.88-6.87 (t,  $J = 2.3$  Hz, 1H), 6.83-6.80 (dd,  $J = 8.3, 2.6$  Hz, 1H), 6.74-6.71 (dd,  $J = 7.8, 2.2$  Hz, 1H), 5.39-5.35 (t,  $J = 5.4$  Hz, 1H), 3.63-3.50 (m, 2H), 3.08-3.02 (m, 2H), 2.88-2.81 (m, 2H), 2.09 (s, 3H).  $^{13}\text{C}$ -NMR ( $\text{CDCl}_3$ , 100 MHz)  $\delta$  (ppm): 206.99, 149.81, 137.87, 135.19, 134.27, 130.32, 128.65, 127.06, 126.90, 126.48, 117.75, 113.93, 112.28, 54.52, 50.22, 42.14, 31.23, 27.16.

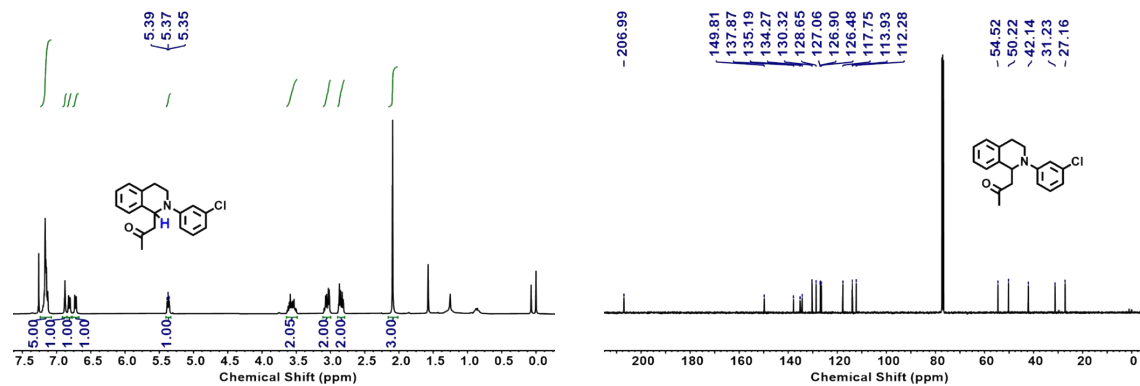

**Fig. S41**  $^1\text{H}$ -NMR (left) and  $^{13}\text{C}$ -NMR (right) of **3f**.

**3g:**  $^1\text{H}$ -NMR ( $\text{CDCl}_3$ , 400 MHz)  $\delta$  (ppm): 7.36-7.32 (m, 2H), 7.22-7.15 (m, 4H), 6.86-6.82 (m, 2H), 5.39-5.35 (t,  $J = 8.0$  Hz, 1H), 3.65-3.59 (m, 1H), 3.57-3.50 (m, 1H), 3.10-3.03 (m, 2H), 2.89-2.83 (m, 2H), 2.11 (s, 3H).  $^{13}\text{C}$ -NMR ( $\text{CDCl}_3$ , 100 MHz)  $\delta$  (ppm): 207.75, 147.79, 137.89, 134.20, 132.06, 128.70, 127.01, 126.83, 126.45, 116.16, 54.67, 50.14, 42.19, 31.17, 27.04.

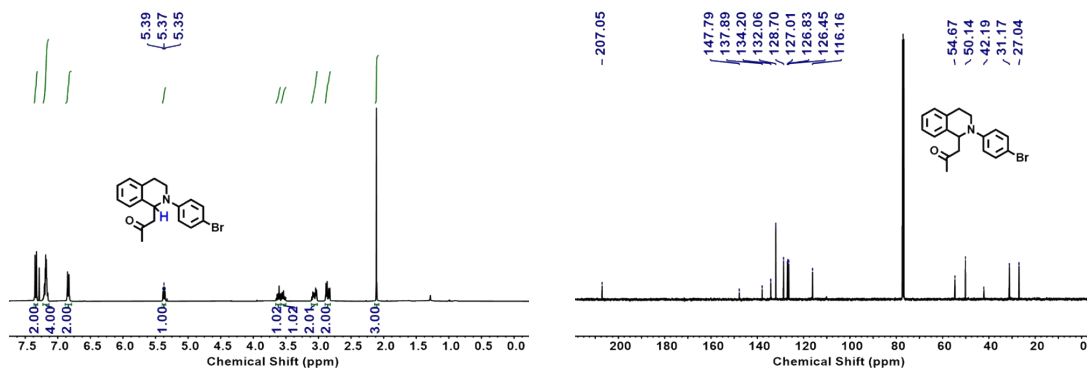

**Fig. S42**  $^1\text{H}$ -NMR (left) and  $^{13}\text{C}$ -NMR (right) of **3g**.

**3h:**  $^1\text{H}$ -NMR ( $\text{CDCl}_3$ , 400 MHz)  $\delta$  (ppm): 7.49-7.45 (m, 2H), 7.19-7.11 (m, 4H), 6.71-6.67 (m, 2H), 5.35-5.32 (t,  $J = 5.4$  Hz, 1H), 3.60-3.46 (m, 2H), 3.06-2.98 (m, 2H), 2.85-2.79 (m, 2H), 2.07 (s, 3H).  $^{13}\text{C}$ -NMR ( $\text{CDCl}_3$ , 100 MHz)  $\delta$  (ppm) 207.01, 148.35, 137.96, 137.92, 134.24, 128.69, 127.05, 126.85, 126.47, 116.52, 79.26, 54.45, 50.15, 42.03, 31.21, 27.14.

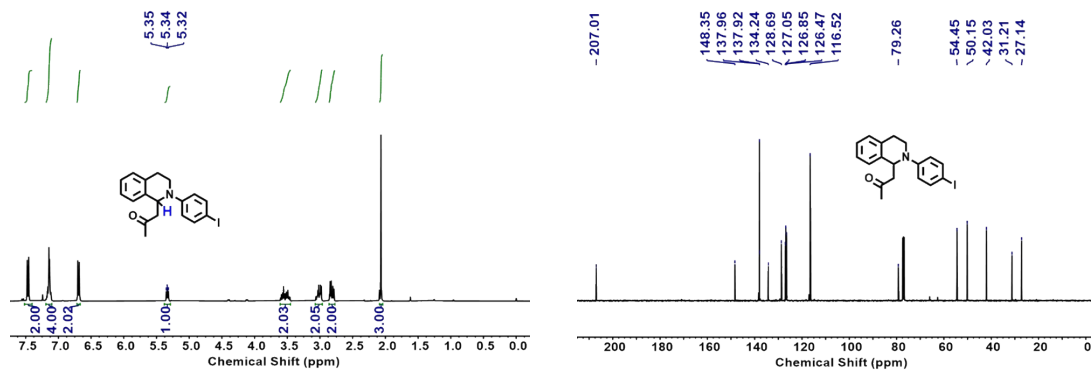

Fig. S43  $^1\text{H}$ -NMR (left) and  $^{13}\text{C}$ -NMR (right) of **3h**.

### 7.3. Yields of **3b-3h** determined by $^1\text{H}$ -NMR and GC analysis

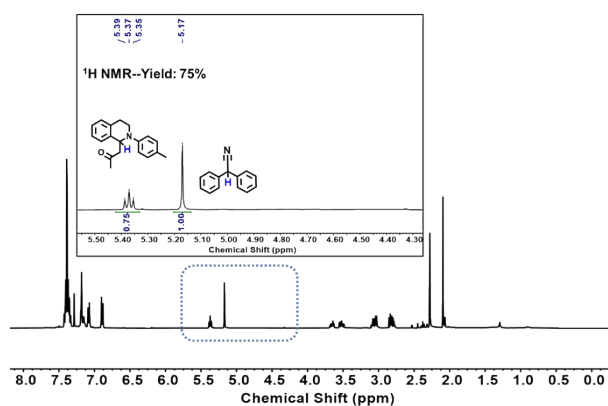

Fig. S44 Yield of **3b** determined by  $^1\text{H}$ -NMR with DPAT as internal standard.

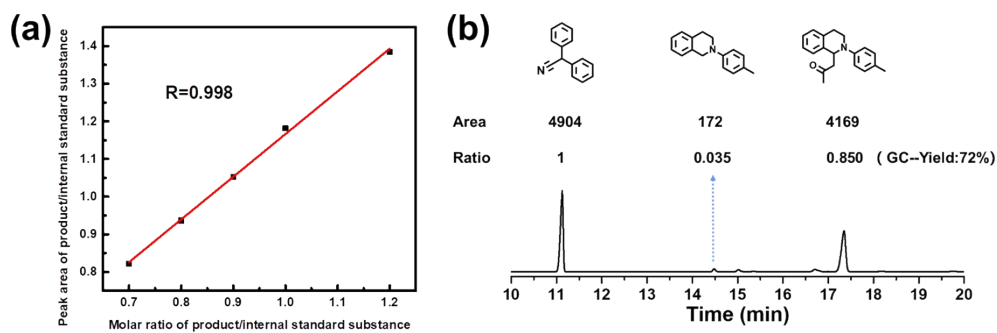

Fig. S45 Yield of **3b** determined by GC with DPAT as internal standard.



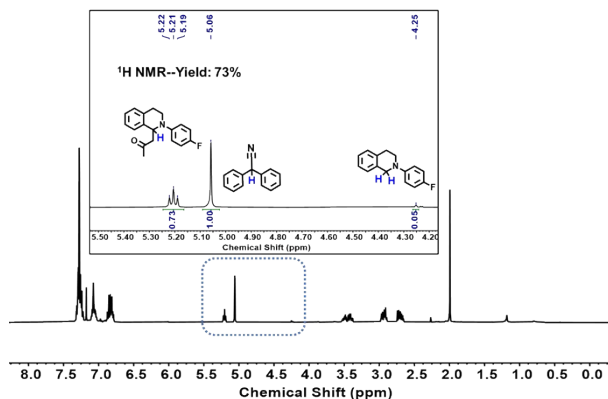

Fig. S46 Yield of **3c** determined by  $^1\text{H-NMR}$  with DPAT as internal standard.

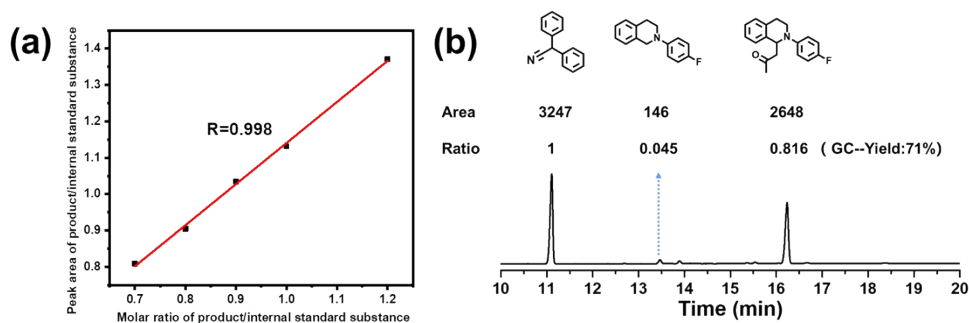

Fig. S47 Yield of **3c** determined by GC with DPAT as internal standard.

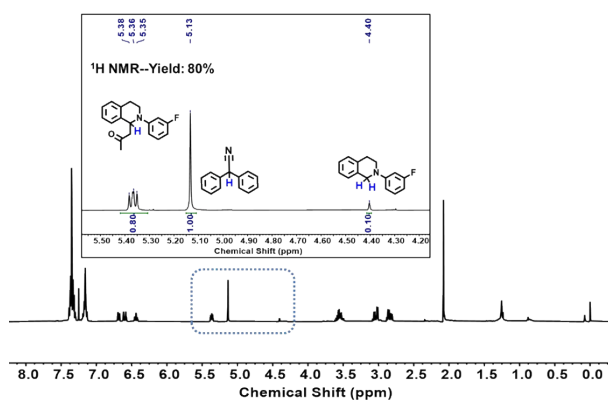

Fig. S48 Yield of **3d** determined by  $^1\text{H-NMR}$  with DPAT as internal standard.

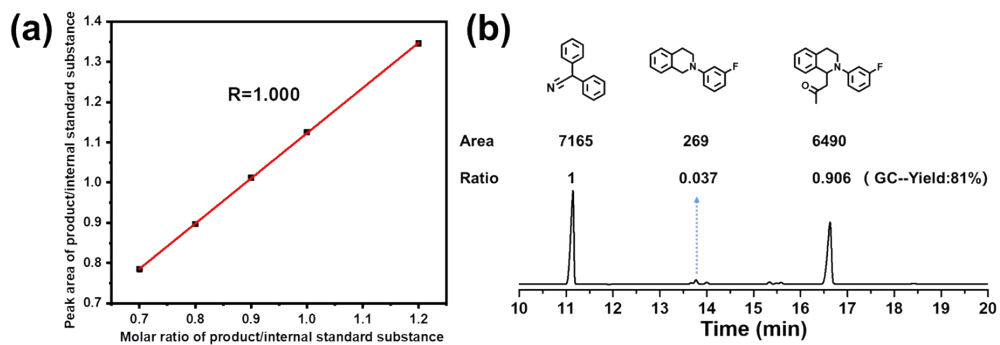

**Fig. S49** Yield of **3d** determined by GC with DPAT as internal standard.

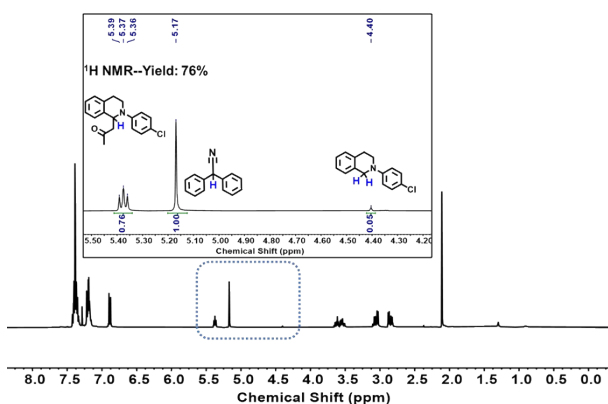

**Fig. S50** Yield of **3e** determined by <sup>1</sup>H-NMR with DPAT as internal standard.

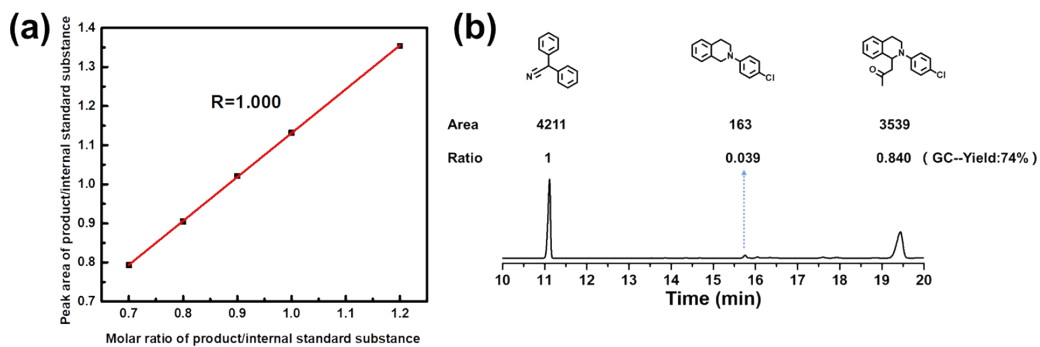

**Fig.51** Yield of **3e** determined by GC with DPAT as internal standard.

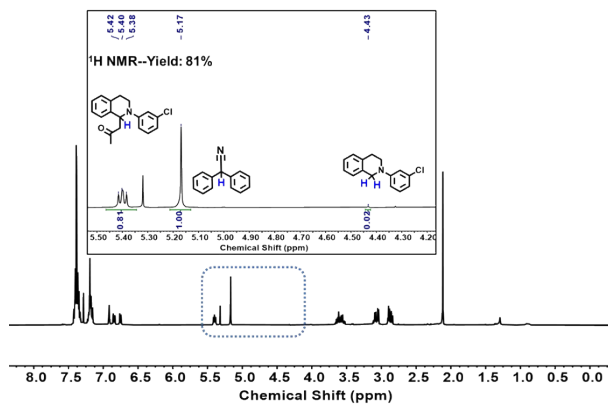

Fig. S52 Yield of **3f** determined by  $^1\text{H-NMR}$  with DPAT as internal standard.

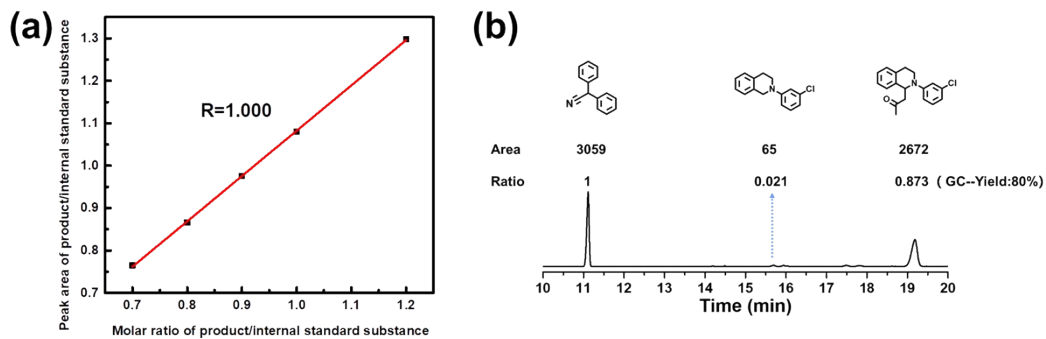

Fig. S53 Yield of **3f** determined by GC with DPAT as internal standard.

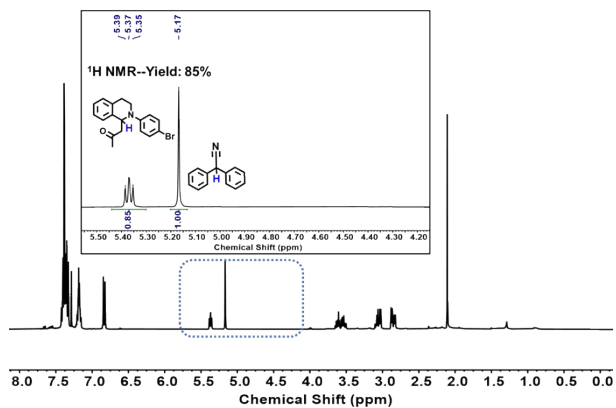

Fig. S54 Yield of **3g** determined by  $^1\text{H-NMR}$  with DPAT as internal standard.

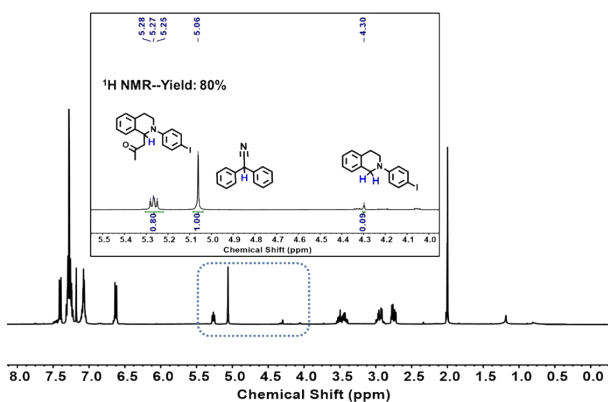

Fig. S55 Yield of **3h** determined by  $^1\text{H-NMR}$  with DPAT as internal standard.

#### 7.4. Synthetic procedures for **3i-3j** (Aza-Henry reaction).

A 10 mL quartz tube was charged with **1a** (0.2 mmol), **TPPy-PBT-COF** (5 mg), nitroalkanes (0.5 mL) and methanol (2 mL). The mixture was bubbled with oxygen and stirred, then the tube was irradiated with natural sunlight in room temperature. After reaction, the solution was centrifuged and the supernatant was removed by rotary evaporation. Yields were determined by  $^1\text{H NMR}$  spectroscopy with 0.2 mmol DPAT as internal standard.

**3i**:  $^1\text{H-NMR}$  ( $\text{CDCl}_3$ , 400 MHz)  $\delta$  (ppm): 7.23-7.05 (m, 6H), 6.91-6.89 (d,  $J = 8.0$  Hz, 2H), 6.79-6.76 (t,  $J = 7.3$  Hz, 1H), 5.49-5.46 (t,  $J = 7.2$  Hz, 1H), 4.82-4.77 (dd,  $J = 11.9, 7.8$  Hz, 1H), 4.51-4.46 (dd,  $J = 11.7, 6.6$  Hz, 1H), 3.62-3.51 (m, 2H), 3.05-2.98 (m, 1H), 2.75-2.68 (m, 1H).  $^{13}\text{C-NMR}$  ( $\text{CDCl}_3$ , 100 MHz)  $\delta$  (ppm): 148.44, 135.31, 132.94, 129.54, 129.23, 128.16, 127.03, 126.74, 119.45, 115.11, 78.81, 58.23, 42.09, 26.47.

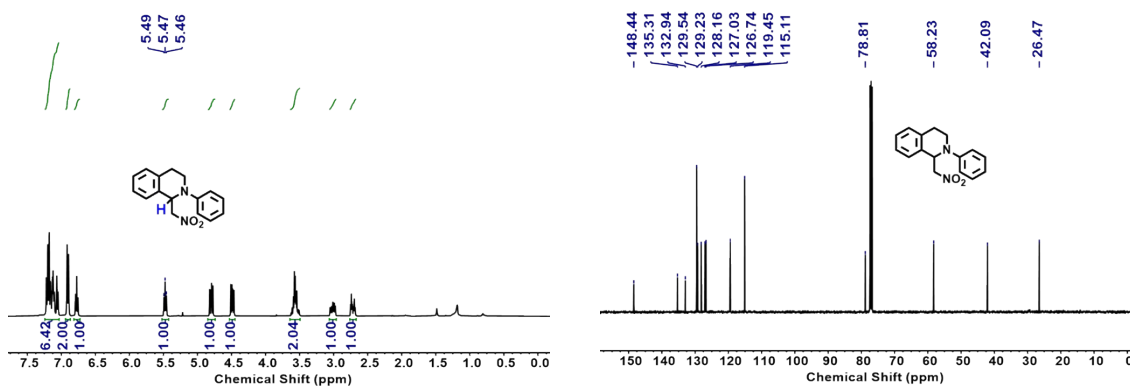

Fig. S56  $^1\text{H-NMR}$  (left) and  $^{13}\text{C-NMR}$  (right) of **3i**.

**3j**:  $^1\text{H-NMR}$  ( $\text{CDCl}_3$ , 400 MHz):  $\delta$  (ppm) 7.22-7.02 (m, 6H), 6.94-6.89 (m, 2H), 6.77-6.72 (m, 1H), 5.19-5.14 (t,  $J = 9.4$  Hz, 1H), 5.01-4.77 (m, 1H), 3.79-3.47 (m, 2H), 3.02-2.81 (m, 2H), 1.63-1.62 (d,  $J = 6.9$  Hz, 1H), 1.47-1.46 (d,  $J = 6.7$  Hz, 2H).  $^{13}\text{C-NMR}$  ( $\text{CDCl}_3$ , 100 MHz)  $\delta$  (ppm): 149.17, 148.89, 135.64, 134.80, 133.83, 132.04, 129.46, 129.34, 129.14, 128.74, 128.39, 128.24, 127.28, 126.64, 126.16, 119.35, 118.80, 115.43, 114.49, 88.99, 85.46, 62.77, 61.17, 43.58, 42.68, 26.78, 26.41, 17.47, 16.42.

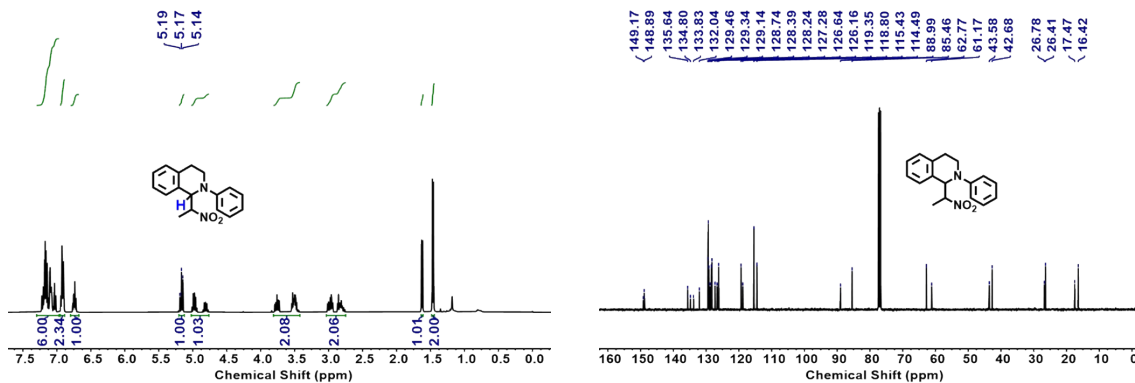

Fig. S57  $^1\text{H-NMR}$  (left) and  $^{13}\text{C-NMR}$  (right) of **3j**.

## 7.5. Yields of **3i-3j** determined by $^1\text{H-NMR}$ analysis

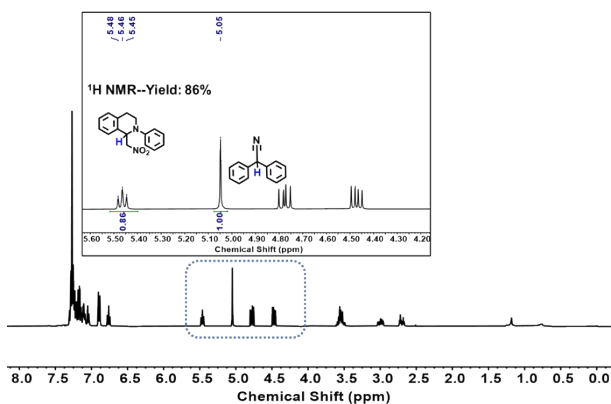

Fig. S58 Yield of **3i** determined by  $^1\text{H-NMR}$  with DPAT as internal standard.

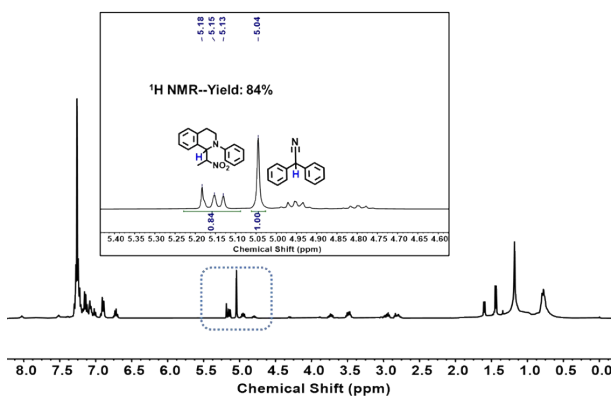

**Fig. S59** Yield of **3j** determined by  $^1\text{H-NMR}$  with DPAT as internal standard.

### 7.6. Synthetic procedures for **3k-3l** (CDC reaction with dialkyl malonates).

A 10 mL quartz tube was charged with **1a** (0.2 mmol), TPPy-PBT-COF (5 mg), dialkyl malonates (0.2 mL) and methanol (2 mL). The mixture was bubbled with oxygen and stirred, then the tube was irradiated with natural sunlight in room temperature. After reaction, the solution was centrifuged and the supernatant was removed by rotary evaporation. Yields were determined by  $^1\text{H-NMR}$  spectroscopy with 0.2 mmol DPAT as internal standard.

**3k**:  $^1\text{H-NMR}$  ( $\text{CDCl}_3$ , 400 MHz):  $\delta$  (ppm) 7.27-7.20 (m, 4H), 7.17-7.13 (m, 2H), 7.04-7.02 (d,  $J = 8.0$  Hz, 2H), 6.82-6.78 (t,  $J = 7.2$  Hz, 1H), 5.76-5.74 (d,  $J = 8.0$  Hz, 1H), 4.01-3.98 (d,  $J = 9.4$  Hz, 1H), 3.75-3.55 (m, 8H), 3.15-3.07 (m, 1H), 2.94-2.88 (m, 1H).  $^{13}\text{C-NMR}$  ( $\text{CDCl}_3$ , 100 MHz)  $\delta$  (ppm) 168.33, 167.44, 148.80, 135.69, 134.81, 129.15, 129.03, 127.67, 127.08, 126.08, 118.65, 115.22, 59.14, 58.21, 52.60, 52.59, 42.19, 26.06.

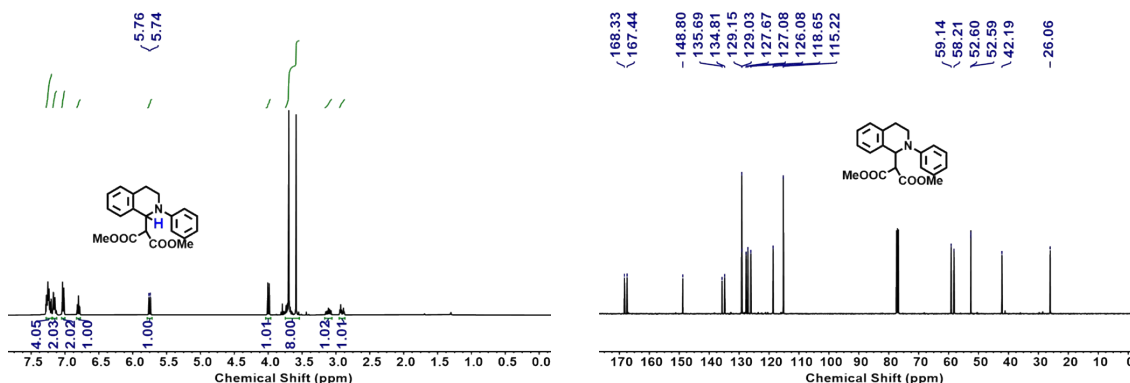

**Fig. S60**  $^1\text{H-NMR}$  (left) and  $^{13}\text{C-NMR}$  (right) of **3k**.

**3l**:  $^1\text{H-NMR}$  ( $\text{CDCl}_3$ , 400 MHz):  $\delta$  (ppm) 7.17-7.01 (m, 6H), 6.92-6.90 (d,  $J = 7.8$  Hz, 2H), 6.69-6.66 (t,  $J = 7.3$  Hz, 1H), 5.66-5.64 (d,  $J = 8.0$  Hz, 1H), 4.10-3.86 (m, 4H), 3.84-3.81 (d,  $J = 9.3$  Hz, 1H), 3.67-3.53 (m, 2H), 3.04-2.96 (m, 1H), 2.84-2.77 (m, 1H), 1.11-1.08 (t,  $J = 7.1$  Hz, 3H), 1.03-0.99 (t,  $J = 7.2$  Hz, 3H).  $^{13}\text{C-NMR}$  ( $\text{CDCl}_3$ , 100 MHz)  $\delta$  (ppm) 167.99, 167.16, 148.87, 135.98, 134.83, 129.08, 128.91, 127.53, 127.19, 126.02, 118.45, 115.09, 61.60, 59.56, 57.89, 42.28, 26.13, 13.96, 13.90.

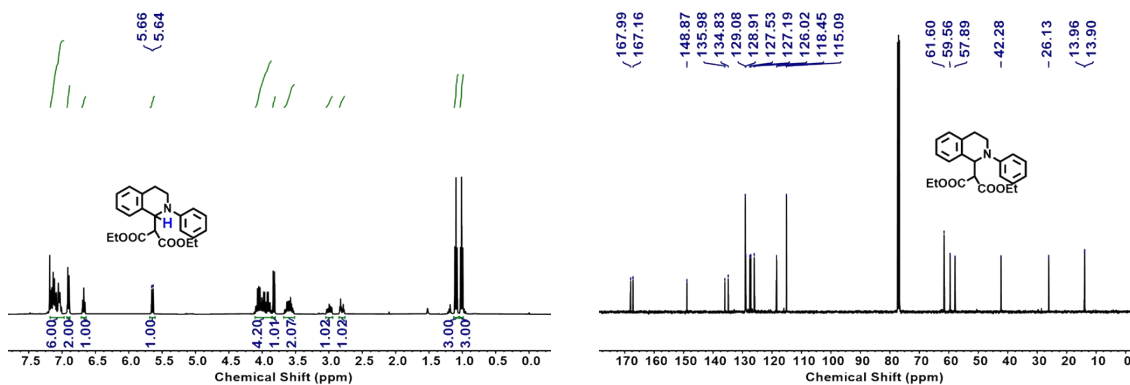

**Fig. S61**  $^1\text{H-NMR}$  (left) and  $^{13}\text{C-NMR}$  (right) of **3l**.

### 7.7. Yields of **3k-3l** determined by $^1\text{H-NMR}$ analysis

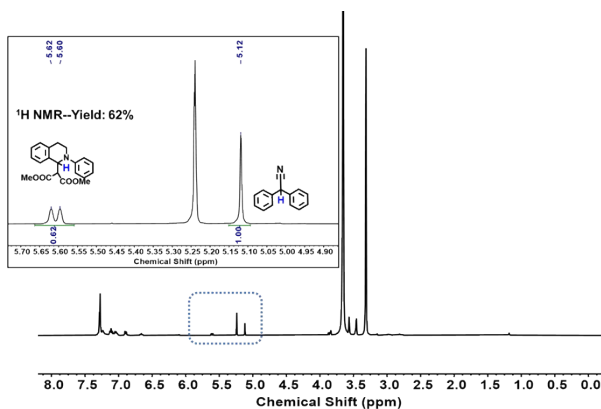

**Fig. S62** Yield of **3k** determined by  $^1\text{H-NMR}$  with DPAT as internal standard.

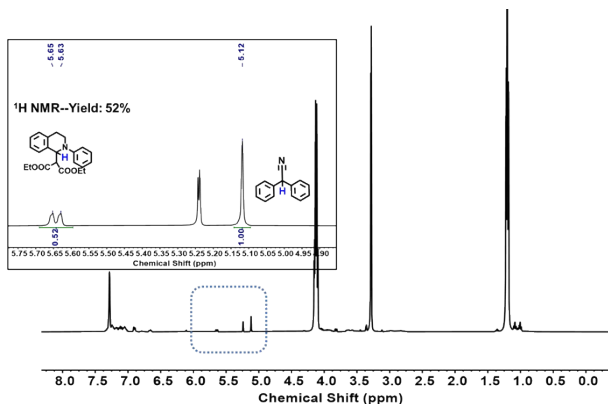

**Fig. S63** Yield of **31** determined by  $^1\text{H-NMR}$  with DPAT as internal standard.

### 7.8. Mannich reaction with 3,4-dihydroquinoxalin-2-one as substrate

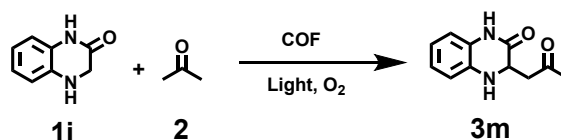

**Scheme S2** Chemical structure and synthetic route of **3m**.

Synthesis procedure for **3m**: A 10 mL quartz tube was charged with **1i** (0.2 mmol), **TPPy-PBT-COF** (5 mg), DMF (1 mL). The mixture was bubbled with oxygen and stirred, then the tube was irradiated with natural sunlight at room temperature. After 7 hours, 0.06mmol L-Proline and 0.5 mL aceton were added, the reaction was performed for additional 21 hours in dark. After reaction, the solution was centrifuged and the supernatant was removed by rotary evaporation. Yield was determined by  $^1\text{H-NMR}$  spectroscopy with 0.2 mmol DPAT as internal standard.  $^1\text{H-NMR}$  (DMSO- $d_6$ , 400 MHz)  $\delta$  (ppm): 10.28 (s, 1H), 6.79-6.68 (m, 3H), 6.63-6.59 (m, 1H), 5.86 (s, 1H), 4.16-4.12 (m, 1H), 3.00-2.94 (dd,  $J = 17.0, 5.1$  Hz, 1H), 2.74-2.68 (dd,  $J = 17.0, 7.1$  Hz, 1H), 2.16 (s, 3H).  $^{13}\text{C-NMR}$  (DMSO- $d_6$ , 100 MHz)  $\delta$  (ppm): 206.41, 167.48, 134.58, 126.47, 123.23, 118.52, 115.30, 114.12, 52.31, 45.30, 30.82.



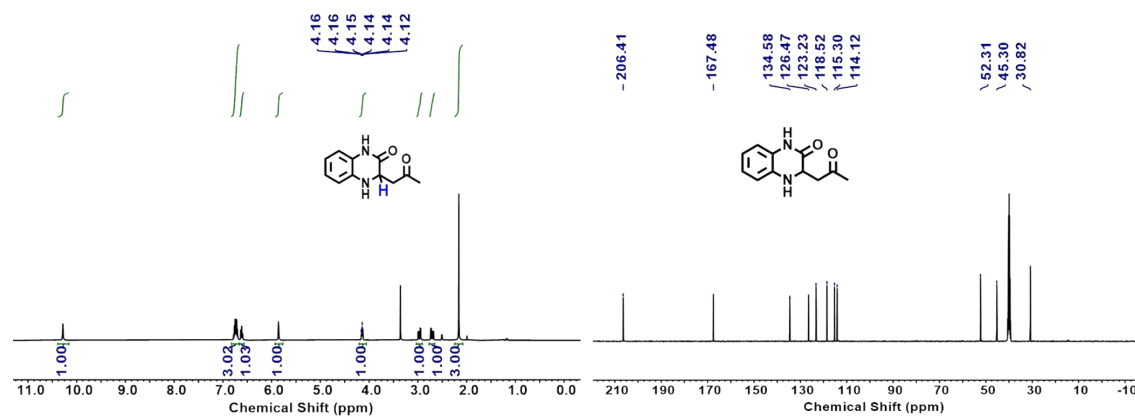

Fig. S64  $^1\text{H}$ -NMR (left) and  $^{13}\text{C}$ -NMR (right) of **3m**.

### 7.9. Yield of **3m** determined by $^1\text{H}$ -NMR analysis

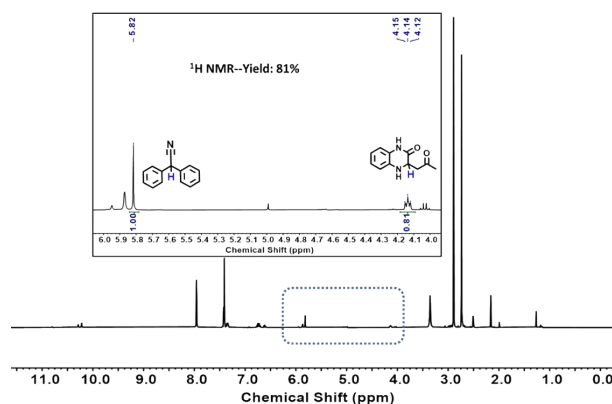

Fig. S65 Yield of **3m** determined by  $^1\text{H}$ -NMR with DPAT as internal standard.

### 7.10. Synthetic procedures for large-scale experiment

A 100 mL quartz tube was charged with **1g** (3.47 mmol, 1 g), L-proline (1.04 mmol, 0.12 g), TPPy-PBT-COF (50 mg), acetone (8 mL) and methanol (30 mL). The mixture was bubbled with oxygen and stirred, then the tube was irradiated with natural light ( $0.04 \text{ w/cm}^2$ - $0.10 \text{ w/cm}^2$ ) for 20 h in room temperature. After reaction, the solution was centrifuged and the supernatant was removed by rotary evaporation and purified by column chromatography on silica gel using petroleum ether/dichloromethane (1:1) as eluent. An excellent yield (0.9142 g, 77%) was afforded in the scaled-up reaction.

## 8. Recycling experiments

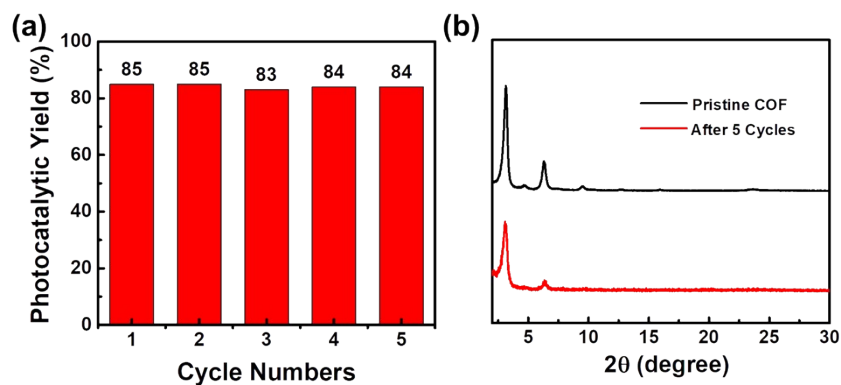

**Fig. S66** (a) Recycling experiments of **3g** irradiated by natural sunlight. (b) PXRD patterns of pristine COF (black) and recycled **TPPy-PBT-COF** after 5 cycles (red).

## 9. Detection of H<sub>2</sub>O<sub>2</sub>

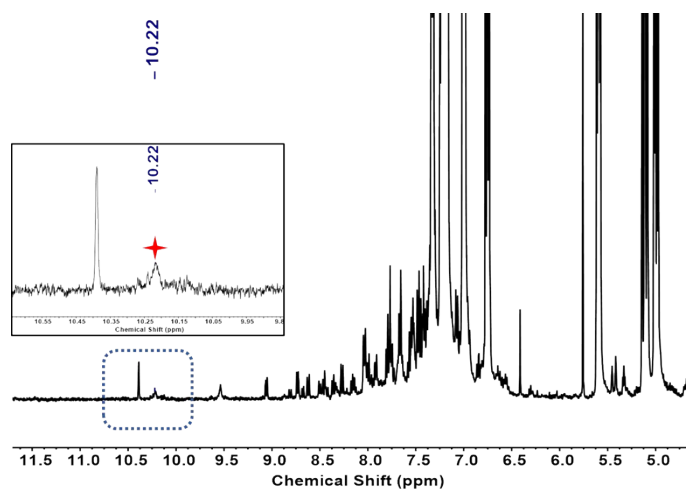

**Fig. S67** <sup>1</sup>H-NMR detection of the H<sub>2</sub>O<sub>2</sub> generated in the photocatalytic reaction. The peak at 10.22 ppm is H<sub>2</sub>O<sub>2</sub> (DMSO-*d*<sub>6</sub>, 400 MHz).

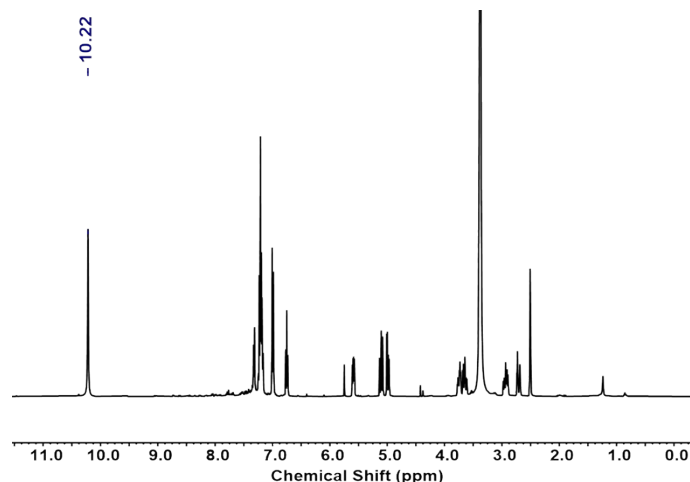

**Fig. S68** Comparison  $^1\text{H-NMR}$  spectrum: one drop of  $\text{H}_2\text{O}_2$  was added in the photocatalytic reaction, which confirmed the peak at 10.22 ppm is  $\text{H}_2\text{O}_2$  ( $\text{DMSO-}d_6$ , 400 MHz).

## 10. Crystallographic parameters

| TPPY-PBT-COF Space group: $P1$<br>$a = 42.31\text{Å}$ , $b = 38.50\text{Å}$ , $c = 7.77\text{Å}$<br>$\alpha = 81.94^\circ$ , $\beta = 99.65^\circ$ , $\gamma = 91.05^\circ$ |          |         |         |
|-----------------------------------------------------------------------------------------------------------------------------------------------------------------------------|----------|---------|---------|
| Atom                                                                                                                                                                        | x        | y       | z       |
| C1                                                                                                                                                                          | 0.25877  | 0.47437 | 0.94364 |
| C2                                                                                                                                                                          | 0.28784  | 0.45595 | 0.97841 |
| C3                                                                                                                                                                          | 0.28871  | 0.41928 | 0.97736 |
| C4                                                                                                                                                                          | 0.25946  | 0.3972  | 0.97068 |
| C5                                                                                                                                                                          | 0.23967  | 0.39731 | 1.09873 |
| C6                                                                                                                                                                          | 0.21254  | 0.37602 | 1.09548 |
| C7                                                                                                                                                                          | 0.20517  | 0.35354 | 0.96765 |
| C8                                                                                                                                                                          | 0.22513  | 0.3531  | 0.84007 |
| C9                                                                                                                                                                          | 0.2521   | 0.37471 | 0.84214 |
| C10                                                                                                                                                                         | -0.16089 | 0.03546 | 0.87947 |
| C11                                                                                                                                                                         | -0.16321 | 0.07235 | 0.85482 |
| C12                                                                                                                                                                         | -0.13368 | 0.01869 | 0.84895 |
| C13                                                                                                                                                                         | -0.1347  | 0.09456 | 0.84179 |
| C14                                                                                                                                                                         | -0.1246  | 0.10533 | 0.67996 |
| C15                                                                                                                                                                         | -0.09701 | 0.12587 | 0.67394 |
| C16                                                                                                                                                                         | -0.07969 | 0.13628 | 0.82858 |
| C17                                                                                                                                                                         | -0.08983 | 0.12487 | 0.99067 |
| C18                                                                                                                                                                         | -0.11716 | 0.10433 | 0.99663 |
| N19                                                                                                                                                                         | -0.05124 | 0.15699 | 0.81876 |
| C20                                                                                                                                                                         | -0.00852 | 0.19552 | 0.92357 |
| C21                                                                                                                                                                         | 0.00852  | 0.19325 | 0.78511 |
| C22                                                                                                                                                                         | 0.03773  | 0.21069 | 0.7805  |

|     |          |         |         |
|-----|----------|---------|---------|
| C23 | 0.05053  | 0.23042 | 0.91482 |
| C24 | 0.03333  | 0.23274 | 1.05249 |
| C25 | 0.00411  | 0.21547 | 1.05667 |
| C26 | 0.0815   | 0.24902 | 0.91082 |
| C27 | 0.10854  | 0.23271 | 0.87366 |
| C28 | 0.1372   | 0.2502  | 0.87056 |
| C29 | 0.14072  | 0.28495 | 0.90604 |
| C30 | 0.11385  | 0.3017  | 0.94386 |
| C31 | 0.08462  | 0.28395 | 0.94617 |
| N32 | 0.17658  | 0.33285 | 0.96676 |
| C33 | -0.03903 | 0.17688 | 0.93485 |
| C34 | 0.17167  | 0.30333 | 0.9034  |
| H35 | 0.23613  | 0.46141 | 0.90969 |
| H36 | 0.24522  | 0.414   | 1.20095 |
| H37 | 0.19733  | 0.37673 | 1.19403 |
| H38 | 0.2196   | 0.33675 | 0.73665 |
| H39 | 0.26711  | 0.37416 | 0.74253 |
| H40 | -0.11412 | 0.03335 | 0.80095 |
| H41 | -0.13787 | 0.09758 | 0.5597  |
| H42 | -0.08923 | 0.13387 | 0.54858 |
| H43 | -0.0764  | 0.13094 | 1.1137  |
| H44 | -0.12454 | 0.09572 | 1.12269 |
| H45 | -0.00067 | 0.17806 | 0.68058 |
| H46 | 0.05016  | 0.209   | 0.67098 |
| H47 | -0.05107 | 0.18017 | 1.04397 |
| H48 | 0.19059  | 0.29126 | 0.85395 |
| C49 | -0.18603 | 0.01485 | 0.9364  |
| C50 | -0.19139 | 0.08887 | 0.87063 |
| H51 | -0.19251 | 0.11571 | 0.84765 |
| C52 | 0.37471  | 0.47597 | 1.07196 |
| C53 | 0.34661  | 0.45704 | 1.02948 |
| C54 | 0.34732  | 0.42065 | 1.01348 |
| C55 | 0.31816  | 0.40259 | 0.98827 |
| C56 | 0.37745  | 0.40032 | 1.01877 |
| C57 | 0.40174  | 0.41398 | 0.92612 |
| C58 | 0.42905  | 0.39414 | 0.9257  |
| C59 | 0.43244  | 0.35978 | 1.01339 |
| C60 | 0.40794  | 0.34564 | 1.10396 |
| C61 | 0.38092  | 0.36571 | 1.10641 |
| C62 | 0.7843   | 0.03185 | 0.96616 |
| C63 | 0.7812   | 0.06885 | 0.92873 |
| C64 | 0.76126  | 0.01047 | 1.03723 |
| C65 | 0.75267  | 0.08941 | 0.94893 |
| C66 | 0.72111  | 0.07865 | 0.89332 |

|      |          |         |         |
|------|----------|---------|---------|
| C67  | 0.69495  | 0.09932 | 0.90455 |
| C68  | 0.69965  | 0.1317  | 0.96643 |
| C69  | 0.73103  | 0.14257 | 1.02453 |
| C70  | 0.75716  | 0.12176 | 1.01451 |
| N71  | 0.67199  | 0.15232 | 0.97077 |
| C72  | 0.64156  | 0.20381 | 0.98747 |
| C73  | 0.6116   | 0.18708 | 0.96938 |
| C74  | 0.58406  | 0.20447 | 0.98156 |
| C75  | 0.58473  | 0.23959 | 1.01223 |
| C76  | 0.61438  | 0.25708 | 1.02315 |
| C77  | 0.6425   | 0.2393  | 1.01249 |
| C78  | 0.55521  | 0.2579  | 1.03135 |
| C79  | 0.53351  | 0.24089 | 1.13319 |
| C80  | 0.50552  | 0.2578  | 1.14979 |
| C81  | 0.49861  | 0.29208 | 1.06535 |
| C82  | 0.52048  | 0.30944 | 0.96566 |
| C83  | 0.54859  | 0.29251 | 0.94945 |
| N84  | 0.46084  | 0.34044 | 1.00548 |
| C85  | 0.67165  | 0.18572 | 0.98013 |
| C86  | 0.46866  | 0.30903 | 1.08486 |
| H87  | 0.39787  | 0.46334 | 1.10967 |
| H88  | 0.39962  | 0.44006 | 0.85326 |
| H89  | 0.44759  | 0.40552 | 0.85521 |
| H90  | 0.40909  | 0.31926 | 1.17295 |
| H91  | 0.36264  | 0.35396 | 1.17773 |
| H92  | 0.74124  | 0.0213  | 1.08179 |
| H93  | 0.71642  | 0.05468 | 0.83678 |
| H94  | 0.67089  | 0.09064 | 0.85884 |
| H95  | 0.7356   | 0.16658 | 1.08158 |
| H96  | 0.78097  | 0.13062 | 1.06349 |
| H97  | 0.61597  | 0.28436 | 1.04282 |
| H98  | 0.66503  | 0.2533  | 1.02479 |
| H99  | 0.51588  | 0.336   | 0.89989 |
| H100 | 0.56488  | 0.30625 | 0.87027 |
| H101 | 0.69339  | 0.201   | 0.98177 |
| H102 | 0.45362  | 0.29454 | 1.16873 |
| C103 | -0.18218 | 0.9759  | 0.9773  |
| C104 | 0.37385  | 0.51391 | 1.07316 |
| C105 | 0.34472  | 0.53222 | 1.04664 |
| C106 | 0.34386  | 0.56881 | 1.04841 |
| C107 | 0.31445  | 0.586   | 1.02506 |
| C108 | 0.37314  | 0.59065 | 1.06729 |
| C109 | 0.39598  | 0.58578 | 1.22176 |
| C110 | 0.42442  | 0.60501 | 1.23334 |

|      |         |         |         |
|------|---------|---------|---------|
| C111 | 0.42952 | 0.63071 | 1.09458 |
| C112 | 0.40589 | 0.63696 | 0.94342 |
| C113 | 0.37796 | 0.61692 | 0.92961 |
| C114 | 0.79063 | 0.95467 | 1.03252 |
| C115 | 0.79257 | 0.91777 | 1.05174 |
| C116 | 0.76333 | 0.9721  | 1.05807 |
| C117 | 0.76462 | 0.89478 | 1.07463 |
| C118 | 0.74956 | 0.89355 | 1.22321 |
| C119 | 0.72198 | 0.87338 | 1.23536 |
| C120 | 0.7101  | 0.85281 | 1.10404 |
| C121 | 0.72598 | 0.85283 | 0.95913 |
| C122 | 0.75292 | 0.8738  | 0.94424 |
| N123 | 0.68096 | 0.83362 | 1.11477 |
| C124 | 0.6452  | 0.78487 | 1.07606 |
| C125 | 0.61648 | 0.80418 | 1.03763 |
| C126 | 0.58705 | 0.78698 | 1.03404 |
| C127 | 0.58575 | 0.7502  | 1.07348 |
| C128 | 0.61475 | 0.73114 | 1.117   |
| C129 | 0.64411 | 0.74827 | 1.11455 |
| C130 | 0.55426 | 0.73208 | 1.07078 |
| C131 | 0.52865 | 0.74783 | 1.1276  |
| C132 | 0.49859 | 0.73159 | 1.12068 |
| C133 | 0.49367 | 0.69872 | 1.06283 |
| C134 | 0.51921 | 0.68305 | 1.00768 |
| C135 | 0.54849 | 0.69943 | 1.00924 |
| N136 | 0.45951 | 0.64879 | 1.10481 |
| C137 | 0.67631 | 0.80237 | 1.071   |
| C138 | 0.46197 | 0.68219 | 1.05533 |
| H139 | 0.3967  | 0.52692 | 1.09502 |
| H140 | 0.39193 | 0.56659 | 1.33118 |
| H141 | 0.44236 | 0.60015 | 1.35101 |
| H142 | 0.40958 | 0.65648 | 0.83411 |
| H143 | 0.36028 | 0.62152 | 0.81053 |
| H144 | 0.74391 | 0.95865 | 1.09384 |
| H145 | 0.75861 | 0.90895 | 1.32696 |
| H146 | 0.70992 | 0.87362 | 1.34751 |
| H147 | 0.71693 | 0.83756 | 0.85477 |
| H148 | 0.76433 | 0.87423 | 0.82907 |
| H149 | 0.61674 | 0.83248 | 1.00542 |
| H150 | 0.56527 | 0.80252 | 0.99764 |
| H151 | 0.69572 | 0.78822 | 1.03633 |
| H152 | 0.4407  | 0.69858 | 1.01689 |
| C153 | 0.25803 | 0.51262 | 0.9338  |
| C154 | 0.28579 | 0.53184 | 0.98066 |

|      |          |         |         |
|------|----------|---------|---------|
| C155 | 0.28495  | 0.56873 | 0.98906 |
| C156 | 0.25475  | 0.59047 | 0.9708  |
| C157 | 0.22652  | 0.57669 | 1.02796 |
| C158 | 0.19967  | 0.5979  | 1.01774 |
| C159 | 0.20118  | 0.63405 | 0.96936 |
| C160 | 0.22927  | 0.64856 | 0.91744 |
| C161 | 0.25513  | 0.62694 | 0.91206 |
| C162 | -0.15382 | 0.95939 | 0.95419 |
| C163 | -0.15031 | 0.92225 | 0.99517 |
| C164 | -0.1311  | 0.98037 | 0.87646 |
| C165 | -0.12107 | 0.90377 | 1.00212 |
| C166 | -0.09078 | 0.9182  | 1.05933 |
| C167 | -0.06241 | 0.89981 | 1.06343 |
| C168 | -0.0634  | 0.86589 | 1.01864 |
| C169 | -0.09327 | 0.85078 | 0.96605 |
| C170 | -0.12158 | 0.86935 | 0.95855 |
| N171 | -0.03388 | 0.84766 | 1.02347 |
| C172 | -0.00037 | 0.79621 | 1.04978 |
| C173 | 0.02466  | 0.81417 | 0.97783 |
| C174 | 0.05261  | 0.79628 | 0.96507 |
| C175 | 0.0567   | 0.76013 | 1.02827 |
| C176 | 0.03165  | 0.743   | 1.10523 |
| C177 | 0.00397  | 0.7605  | 1.11377 |
| C178 | 0.08671  | 0.74149 | 1.01511 |
| C179 | 0.11629  | 0.75918 | 1.02647 |
| C180 | 0.14441  | 0.74184 | 1.01487 |
| C181 | 0.14369  | 0.70641 | 0.99188 |
| C182 | 0.11429  | 0.68869 | 0.9778  |
| C183 | 0.08612  | 0.70611 | 0.98742 |
| N184 | 0.17372  | 0.65491 | 0.9746  |
| C185 | -0.03083 | 0.81374 | 1.05472 |
| C186 | 0.1737   | 0.68831 | 0.98425 |
| H187 | 0.23542  | 0.52516 | 0.87728 |
| H188 | 0.22535  | 0.55003 | 1.09155 |
| H189 | 0.17807  | 0.58639 | 1.0577  |
| H190 | 0.23109  | 0.67637 | 0.8748  |
| H191 | 0.27541  | 0.63925 | 0.86054 |
| H192 | -0.1116  | 0.96918 | 0.82844 |
| H193 | -0.08874 | 0.94346 | 1.1057  |
| H194 | -0.03956 | 0.91168 | 1.10622 |
| H195 | -0.0949  | 0.825   | 0.92508 |
| H196 | -0.14375 | 0.85706 | 0.90837 |
| H197 | 0.02246  | 0.84186 | 0.92844 |
| H198 | 0.07075  | 0.81086 | 0.90292 |

|      |          |         |         |
|------|----------|---------|---------|
| H199 | 0.11292  | 0.66139 | 0.95773 |
| H200 | 0.06383  | 0.69192 | 0.9678  |
| H201 | -0.05071 | 0.79764 | 1.089   |
| H202 | 0.1958   | 0.70306 | 0.99466 |
| C203 | 0.82107  | 0.90176 | 1.03625 |
| H204 | 0.82226  | 0.87342 | 1.06316 |
| C205 | 0.31676  | 0.4748  | 1.00667 |
| C206 | 0.31569  | 0.51367 | 1.01413 |
| C207 | 0.22639  | 0.67497 | 0.50905 |
| C208 | 0.19688  | 0.69215 | 0.48878 |
| C209 | 0.19525  | 0.72819 | 0.50326 |
| C210 | 0.1657   | 0.74348 | 0.50652 |
| C211 | 0.2238   | 0.75104 | 0.50356 |
| C212 | 0.24041  | 0.75394 | 0.36047 |
| C213 | 0.26786  | 0.7745  | 0.36019 |
| C214 | 0.27878  | 0.79319 | 0.5002  |
| C215 | 0.26197  | 0.79069 | 0.64344 |
| C216 | 0.23451  | 0.76982 | 0.64436 |
| C217 | 0.64027  | 1.11537 | 0.43006 |
| C218 | 0.64022  | 1.07847 | 0.43131 |
| C219 | 0.61174  | 1.13429 | 0.41848 |
| C220 | 0.61236  | 1.05754 | 0.42128 |
| C221 | 0.58544  | 1.06566 | 0.28904 |
| C222 | 0.55807  | 1.04466 | 0.28424 |
| C223 | 0.55731  | 1.01464 | 0.40798 |
| C224 | 0.58448  | 1.00579 | 0.53713 |
| C225 | 0.61181  | 1.02664 | 0.54155 |
| N226 | 0.52814  | 0.99491 | 0.40535 |
| C227 | 0.49501  | 0.94458 | 0.47518 |
| C228 | 0.46547  | 0.9624  | 0.42204 |
| C229 | 0.43691  | 0.94548 | 0.43796 |
| C230 | 0.43612  | 0.9098  | 0.5059  |
| C231 | 0.46536  | 0.8914  | 0.55588 |
| C232 | 0.4945   | 0.90867 | 0.54168 |
| C233 | 0.40556  | 0.89169 | 0.525   |
| C234 | 0.38408  | 0.90479 | 0.61998 |
| C235 | 0.35532  | 0.88737 | 0.63915 |
| C236 | 0.34744  | 0.85685 | 0.5619  |
| C237 | 0.36901  | 0.84378 | 0.46677 |
| C238 | 0.39793  | 0.86093 | 0.44977 |
| N239 | 0.30766  | 0.81312 | 0.4944  |
| C240 | 0.52627  | 0.9621  | 0.47013 |
| C241 | 0.31678  | 0.83902 | 0.58111 |
| H242 | 0.24879  | 0.68841 | 0.54228 |



|      |          |         |         |
|------|----------|---------|---------|
| H243 | 0.23228  | 0.73986 | 0.25    |
| H244 | 0.2807   | 0.77595 | 0.25007 |
| H245 | 0.27032  | 0.80395 | 0.7562  |
| H246 | 0.22199  | 0.76776 | 0.75608 |
| H247 | 0.58874  | 1.12173 | 0.41719 |
| H248 | 0.58571  | 1.08801 | 0.18811 |
| H249 | 0.53739  | 1.05173 | 0.18346 |
| H250 | 0.58445  | 0.98346 | 0.63841 |
| H251 | 0.63214  | 1.0194  | 0.64475 |
| H252 | 0.36363  | 0.82028 | 0.40577 |
| H253 | 0.41421  | 0.85041 | 0.3761  |
| H254 | 0.54784  | 0.94686 | 0.52327 |
| H255 | 0.3016   | 0.84867 | 0.66336 |
| C256 | -0.32892 | 1.0599  | 0.45097 |
| H257 | -0.33003 | 1.03245 | 0.43302 |
| C258 | 0.66985  | 1.13329 | 0.45493 |
| C259 | 0.11057  | 0.67012 | 0.39767 |
| C260 | 0.13828  | 0.6892  | 0.44783 |
| C261 | 0.13687  | 0.72471 | 0.47981 |
| C262 | 0.10627  | 0.74341 | 0.48597 |
| C263 | 0.08193  | 0.7267  | 0.56972 |
| C264 | 0.05372  | 0.74452 | 0.57592 |
| C265 | 0.04973  | 0.77991 | 0.50588 |
| C266 | 0.07405  | 0.79708 | 0.42442 |
| C267 | 0.1019   | 0.77906 | 0.41476 |
| C268 | -0.29918 | 1.11368 | 0.47755 |
| C269 | -0.29923 | 1.07685 | 0.47108 |
| C270 | -0.27111 | 1.13224 | 0.5247  |
| C271 | -0.27119 | 1.05602 | 0.48185 |
| C272 | -0.24486 | 1.06871 | 0.4028  |
| C273 | -0.21854 | 1.04727 | 0.40444 |
| C274 | -0.21804 | 1.01218 | 0.48071 |
| C275 | -0.24372 | 0.99921 | 0.56374 |
| C276 | -0.26983 | 1.02074 | 0.56381 |
| N277 | -0.19113 | 0.99081 | 0.47105 |
| C278 | -0.16021 | 0.93796 | 0.49274 |
| C279 | -0.13302 | 0.95609 | 0.44822 |
| C280 | -0.10458 | 0.93802 | 0.4528  |
| C281 | -0.10257 | 0.90143 | 0.50271 |
| C282 | -0.13044 | 0.8832  | 0.53717 |
| C283 | -0.15893 | 0.90133 | 0.53307 |
| C284 | -0.07158 | 0.88243 | 0.51844 |
| C285 | -0.042   | 0.89712 | 0.5845  |
| C286 | -0.01325 | 0.88031 | 0.58695 |

|      |          |         |         |
|------|----------|---------|---------|
| C287 | -0.01242 | 0.8475  | 0.52878 |
| C288 | -0.04179 | 0.83159 | 0.47152 |
| C289 | -0.07096 | 0.84893 | 0.46506 |
| N290 | 0.02047  | 0.79746 | 0.51407 |
| N291 | -0.03924 | 0.92646 | 0.64809 |
| S292 | 0.00168  | 0.93668 | 0.71705 |
| N293 | 0.01205  | 0.89672 | 0.64951 |
| C294 | -0.18965 | 0.95678 | 0.50295 |
| C295 | 0.01856  | 0.83068 | 0.52552 |
| H296 | 0.08724  | 0.68228 | 0.36444 |
| H297 | 0.08461  | 0.69973 | 0.6312  |
| H298 | 0.03518  | 0.7309  | 0.63908 |
| H299 | 0.07125  | 0.82417 | 0.36397 |
| H300 | 0.11987  | 0.79314 | 0.34929 |
| H301 | -0.24826 | 1.11935 | 0.57172 |
| H302 | -0.24497 | 1.09486 | 0.33319 |
| H303 | -0.19891 | 1.05774 | 0.34001 |
| H304 | -0.24382 | 0.9727  | 0.63104 |
| H305 | -0.28866 | 1.00972 | 0.63318 |
| H306 | -0.1335  | 0.98432 | 0.41269 |
| H307 | -0.08419 | 0.95284 | 0.41624 |
| H308 | -0.12997 | 0.85503 | 0.57459 |
| H309 | -0.17978 | 0.88679 | 0.56596 |
| H310 | -0.04224 | 0.80615 | 0.42701 |
| H311 | -0.09296 | 0.83647 | 0.41311 |
| H312 | -0.20984 | 0.94152 | 0.53839 |
| H313 | 0.04009  | 0.8464  | 0.53943 |
| C314 | 0.1122   | 0.63296 | 0.37809 |
| C315 | 0.14172  | 0.61565 | 0.4005  |
| C316 | 0.14321  | 0.57961 | 0.38888 |
| C317 | 0.1146   | 0.55699 | 0.38578 |
| C318 | 0.09521  | 0.5517  | 0.22691 |
| C319 | 0.06848  | 0.52969 | 0.22862 |
| C320 | 0.06106  | 0.51246 | 0.3883  |
| C321 | 0.0805   | 0.51831 | 0.54745 |
| C322 | 0.10707  | 0.54027 | 0.5456  |
| C323 | -0.2999  | 0.18946 | 0.50539 |
| C324 | -0.29956 | 0.22644 | 0.50796 |
| C325 | -0.2714  | 0.1703  | 0.52007 |
| C326 | -0.27109 | 0.24652 | 0.52908 |
| C327 | -0.24541 | 0.23719 | 0.66807 |
| C328 | -0.21751 | 0.25745 | 0.68421 |
| C329 | -0.21507 | 0.28807 | 0.5664  |
| C330 | -0.24098 | 0.29805 | 0.4307  |

|      |          |         |         |
|------|----------|---------|---------|
| C331 | -0.26869 | 0.27778 | 0.41367 |
| N332 | -0.18551 | 0.30734 | 0.5808  |
| C333 | -0.15171 | 0.3581  | 0.5304  |
| C334 | -0.12281 | 0.33876 | 0.56949 |
| C335 | -0.09329 | 0.35574 | 0.56131 |
| C336 | -0.09203 | 0.39234 | 0.51233 |
| C337 | -0.121   | 0.41122 | 0.47681 |
| C338 | -0.1499  | 0.39462 | 0.4864  |
| C339 | -0.06085 | 0.41023 | 0.50544 |
| C340 | -0.03568 | 0.40367 | 0.6485  |
| C341 | -0.00679 | 0.42175 | 0.64766 |
| C342 | -0.00226 | 0.44637 | 0.50279 |
| C343 | -0.02705 | 0.45218 | 0.35663 |
| C344 | -0.05616 | 0.43432 | 0.35832 |
| N345 | 0.03304  | 0.4906  | 0.38489 |
| C346 | -0.18323 | 0.34071 | 0.52718 |
| C347 | 0.02811  | 0.46612 | 0.51085 |
| H348 | 0.08979  | 0.61958 | 0.34407 |
| H349 | 0.10075  | 0.56459 | 0.10251 |
| H350 | 0.0536   | 0.52582 | 0.10524 |
| H351 | 0.07508  | 0.50661 | 0.67384 |
| H352 | 0.12177  | 0.54442 | 0.66922 |
| H353 | -0.24825 | 0.18262 | 0.52771 |
| H354 | -0.24704 | 0.21444 | 0.76549 |
| H355 | -0.19777 | 0.24939 | 0.78951 |
| H356 | -0.23963 | 0.32094 | 0.33421 |
| H357 | -0.28789 | 0.28588 | 0.30506 |
| H358 | -0.12298 | 0.31053 | 0.6044  |
| H359 | -0.07146 | 0.34024 | 0.59098 |
| H360 | -0.02406 | 0.47067 | 0.242   |
| H361 | -0.075   | 0.43925 | 0.24471 |
| H362 | -0.20462 | 0.35639 | 0.47671 |
| H363 | 0.04627  | 0.45975 | 0.62639 |
| C364 | 0.2281   | 0.6371  | 0.50667 |
| C365 | 0.20061  | 0.61742 | 0.4605  |
| C366 | 0.20205  | 0.58098 | 0.44258 |
| C367 | 0.17284  | 0.56332 | 0.40295 |
| C368 | 0.23259  | 0.55981 | 0.46211 |
| C369 | 0.2608   | 0.57392 | 0.406   |
| C370 | 0.28833  | 0.5533  | 0.42364 |
| C371 | 0.28775  | 0.51736 | 0.48186 |
| C372 | 0.25952  | 0.50254 | 0.53115 |
| C373 | 0.23275  | 0.52359 | 0.52544 |
| C374 | 0.6396   | 0.19086 | 0.457   |

|      |          |         |         |
|------|----------|---------|---------|
| C375 | 0.63978  | 0.22724 | 0.47019 |
| C376 | 0.61143  | 0.17236 | 0.41197 |
| C377 | 0.61212  | 0.24745 | 0.47647 |
| C378 | 0.58652  | 0.23302 | 0.55786 |
| C379 | 0.55976  | 0.2532  | 0.56432 |
| C380 | 0.55782  | 0.28855 | 0.49252 |
| C381 | 0.58371  | 0.30384 | 0.41817 |
| C382 | 0.61032  | 0.28361 | 0.4101  |
| N383 | 0.5295   | 0.30792 | 0.50047 |
| C384 | 0.49139  | 0.35588 | 0.43209 |
| C385 | 0.47001  | 0.33928 | 0.53718 |
| C386 | 0.44207  | 0.35649 | 0.55337 |
| C387 | 0.43502  | 0.39061 | 0.46527 |
| C388 | 0.45612  | 0.40672 | 0.35689 |
| C389 | 0.48405  | 0.38957 | 0.34108 |
| C390 | 0.40543  | 0.4091  | 0.48264 |
| C391 | 0.37623  | 0.39099 | 0.48461 |
| C392 | 0.34794  | 0.40883 | 0.49107 |
| C393 | 0.34825  | 0.44503 | 0.50047 |
| C394 | 0.37785  | 0.46245 | 0.50826 |
| C395 | 0.40555  | 0.44499 | 0.49883 |
| N396 | 0.31618  | 0.497   | 0.48835 |
| C397 | 0.52115  | 0.33855 | 0.41289 |
| C398 | 0.31775  | 0.46305 | 0.50077 |
| H399 | 0.25128  | 0.62523 | 0.55418 |
| H400 | 0.26148  | 0.60044 | 0.33949 |
| H401 | 0.3099   | 0.5651  | 0.38448 |
| H402 | 0.25806  | 0.47497 | 0.57975 |
| H403 | 0.21225  | 0.51112 | 0.57408 |
| H404 | 0.58849  | 0.18527 | 0.36894 |
| H405 | 0.58733  | 0.20628 | 0.62207 |
| H406 | 0.54036  | 0.24117 | 0.62592 |
| H407 | 0.58387  | 0.33137 | 0.36659 |
| H408 | 0.62889  | 0.29649 | 0.34498 |
| H409 | 0.47482  | 0.31303 | 0.60677 |
| H410 | 0.4262   | 0.34324 | 0.63668 |
| H411 | 0.45073  | 0.43234 | 0.2812  |
| H412 | 0.49981  | 0.40256 | 0.25615 |
| H413 | 0.53534  | 0.35167 | 0.32006 |
| H414 | 0.29636  | 0.44726 | 0.50089 |
| C415 | -0.32946 | 0.17157 | 0.47602 |
| C416 | -0.32864 | 0.24477 | 0.48587 |
| H417 | -0.32749 | 0.27233 | 0.50034 |
| C418 | 0.16844  | 0.6727  | 0.45925 |

|      |         |         |          |
|------|---------|---------|----------|
| C419 | 0.17034 | 0.63463 | 0.43661  |
| H420 | 1.11531 | 1.32858 | -0.02925 |
| H421 | 1.06436 | 1.29765 | -0.02562 |
| H422 | 1.53179 | 0.77268 | 0.17808  |
| H423 | 1.47927 | 0.74452 | 0.16288  |
| H424 | 0.96133 | 1.38515 | 0.76301  |
| H425 | 1.01193 | 1.41687 | 0.76188  |
| N426 | 0.87638 | 1.44829 | 0.43551  |
| S427 | 0.83562 | 1.46236 | 0.40667  |
| N428 | 0.82337 | 1.41783 | 0.45142  |
| H429 | 1.38978 | 0.92825 | 0.68105  |
| H430 | 1.33918 | 0.89779 | 0.7139   |
| H431 | 1.16533 | 1.77068 | 0.52755  |
| H432 | 1.31512 | 1.61348 | 0.04079  |
| H433 | 1.17265 | 1.53608 | 0.38249  |
| H434 | 1.3182  | 1.37483 | -0.02256 |
| H435 | 1.04271 | 1.24756 | 0.15834  |
| H436 | 0.99144 | 1.21747 | 0.1651   |
| N437 | 1.10982 | 1.19723 | -0.15624 |
| S438 | 1.1487  | 1.18607 | -0.19272 |
| N439 | 1.16217 | 1.22947 | -0.16452 |
| H440 | 1.4657  | 0.86383 | 0.60901  |
| H441 | 1.51668 | 0.89398 | 0.58408  |
| N442 | 1.46166 | 0.99833 | 0.34914  |
| S443 | 1.42033 | 1.01072 | 0.29766  |
| N444 | 1.40939 | 0.96713 | 0.37687  |
| H445 | 1.32573 | 1.39428 | 0.48739  |
| H446 | 1.37505 | 1.36314 | 0.47734  |
| N447 | 1.3829  | 1.4979  | 0.53674  |
| S448 | 1.42436 | 1.50908 | 0.55584  |
| N449 | 1.43357 | 1.46587 | 0.52104  |
| H450 | 1.53836 | 1.21462 | 0.20224  |
| H451 | 1.48925 | 1.24408 | 0.22946  |
| N452 | 1.60603 | 1.15271 | -0.07546 |
| S453 | 1.56431 | 1.1426  | -0.10716 |
| N454 | 1.55566 | 1.18468 | -0.05475 |
| H455 | 1.11798 | 0.78639 | 0.04701  |
| H456 | 1.16683 | 0.75606 | 0.02601  |
| N457 | 1.0323  | 0.70751 | 0.186    |
| S458 | 0.9964  | 0.69594 | 0.27184  |
| N459 | 0.98154 | 0.73946 | 0.1981   |
| H460 | 1.61489 | 0.70301 | 0.15461  |
| H461 | 1.66608 | 0.73298 | 0.1456   |
| N462 | 1.51709 | 0.65114 | -0.06542 |

|      |         |        |          |
|------|---------|--------|----------|
| S463 | 1.55366 | 0.6417 | -0.13586 |
| N464 | 1.57056 | 0.6812 | -0.06538 |

## 11. References

1. Y. Zhi, Z. Li, X. Feng, H. Xia, Y. Zhang, Z. Shi, Y. Mu, X. Liu, *J. Mater. Chem. A* **2017**, *5* (44), 22933-22938.
